# Supplementary material
Source: bioRxiv or medRxiv preprint supplement (https://www.biorxiv.org/highwire/filestream/123393/field_highwire_adjunct_files/3/408492-4.pdf)
Supplement: Supplementary file [file 408492-4.pdf]

Supplementary Table 4. Disease gene lists used in the analysis

| Neurology        | Ophthalmology    | Hematology      | OMIM             |
|------------------|------------------|-----------------|------------------|
| ENSG00000090861  | ENSG00000198691  | ENSG00000139618 | ENSG00000187608  |
| ENSG00000143632  | ENSG00000268757  | ENSG00000136492 | ENSG00000188157  |
| ENSG00000239900  | ENSG00000101986  | ENSG00000178971 | ENSG00000186827  |
| ENSG00000188157  | ENSG00000100997  | ENSG00000130826 | ENSG00000176022  |
| ENSG00000156709  | ENSG00000107897  | ENSG00000268226 | ENSG00000107404  |
| ENSG00000164904  | ENSG00000100412  | ENSG00000197561 | ENSG00000197785  |
| ENSG00000101901  | ENSG00000168615  | ENSG00000175595 | ENSG00000205090  |
| ENSG00000119523  | ENSG00000140873  | ENSG00000180210 | ENSG00000078369  |
| ENSG00000003393  | ENSG00000166748  | ENSG00000198734 | ENSG00000187730  |
| ENSG00000134343  | ENSG00000008469  | ENSG00000101981 | ENSG00000157933  |
| ENSG00000171714  | ENSG00000135541  | ENSG00000187741 | ENSG00000157911  |
| ENSG00000134262  | ENSG00000129221  | ENSG00000181544 | ENSG00000142611  |
| ENSG00000008104  | ENSG00000184254  | ENSG00000158169 | ENSG00000235169  |
| ENSG00000221838  | ENSG00000242110  | ENSG00000144554 | ENSG00000116198  |
| ENSG00000100478  | ENSG00000130203  | ENSG00000112039 | ENSG00000131697  |
| ENSG00000242802  | ENSG00000169379  | ENSG00000183161 | ENSG00000187017  |
| ENSG00000198844  | ENSG00000102931  | ENSG00000221829 | ENSG00000171680  |
| ENSG00000131089  | ENSG00000138175  | ENSG00000140525 | ENSG00000171735  |
| ENSG00000004848  | ENSG00000113966  | ENSG00000115392 | ENSG00000094246  |
| ENSG00000198513  | ENSG00000254636  | ENSG00000187790 | ENSG00000116288  |
| ENSG00000118625  | ENSG00000118217  | ENSG00000267841 | ENSG00000162426  |
| ENSG00000105409  | ENSG00000179774  | ENSG00000102145 | ENSG00000142599  |
| ENSG00000182220  | ENSG00000159363  | ENSG00000179348 | ENSG00000049239  |
| ENSG00000162885  | ENSG00000108641  | ENSG00000105697 | ENSG00000171608  |
| ENSG00000135454  | ENSG00000123810  | ENSG00000101704 | ENSG00000173614  |
| ENSG00000174684  | ENSG00000214413  | ENSG00000265970 | ENSG000000054523 |
| ENSG00000151929  | ENSG00000174483  | ENSG00000168509 | ENSG00000142655  |
| ENSG00000136717  | ENSG00000179941  | ENSG00000117400 | ENSG00000120948  |
| ENSG00000168000  | ENSG00000181004  | ENSG00000145912 | ENSG000000009724 |
| ENSG00000130921  | ENSG00000125124  | ENSG00000182117 | ENSG00000198793  |
| ENSG00000131943  | ENSG00000140463  | ENSG00000083093 | ENSG00000120942  |
| ENSG000000081248 | ENSG00000163093  | ENSG00000115718 | ENSG00000116670  |
| ENSG00000007402  | ENSG00000138686  | ENSG00000184500 | ENSG00000177000  |
| ENSG00000182389  | ENSG00000122507  | ENSG00000108384 | ENSG00000175206  |
| ENSG00000002529  | ENSG00000183337  | ENSG00000142676 | ENSG000000083444 |
| ENSG00000182533  | ENSG00000167995  | ENSG00000161970 | ENSG00000116688  |
| ENSG00000162004  | ENSG00000125378  | ENSG00000182899 | ENSG00000162438  |
| ENSG00000150753  | ENSG00000223953  | ENSG00000122406 | ENSG00000186510  |
| ENSG00000000806  | ENSG00000125730  | ENSG00000124614 | ENSG00000184908  |
| ENSG00000165410  | ENSG00000113600  | ENSG00000105372 | ENSG00000142627  |
| ENSG00000070748  | ENSG00000176434  | ENSG00000272852 | ENSG00000159363  |
| ENSG00000173575  | ENSG00000175544  | ENSG00000138326 | ENSG00000117118  |
| ENSG00000100288  | ENSG00000126907  | ENSG00000197728 | ENSG00000142619  |
| ENSG00000138435  | ENSG00000102001  | ENSG00000171863 | ENSG00000159339  |
| ENSG00000120903  | ENSG00000151062  | ENSG00000159216 | ENSG00000276747  |
| ENSG00000101204  | ENSG00000149260  | ENSG00000117601 | ENSG000000009709 |
| ENSG00000170175  | ENSG00000262875  | ENSG00000138449 | ENSG00000159423  |
| ENSG00000160716  | ENSG00000147044  | ENSG00000188827 | ENSG00000127463  |
| ENSG00000135902  | ENSG00000048342  | ENSG00000270141 | ENSG00000188257  |
| ENSG00000108556  | ENSG00000107736  | ENSG00000164362 | ENSG00000127472  |
| ENSG00000148337  | ENSG000000062038 | ENSG00000106327 | ENSG00000158828  |
| ENSG00000073464  | ENSG00000148600  | ENSG00000092330 | ENSG00000244038  |
| ENSG00000188603  | ENSG00000110274  | ENSG00000267912 | ENSG00000117298  |
| ENSG00000102805  | ENSG00000126001  | ENSG00000151285 | ENSG00000162551  |
| ENSG00000128973  | ENSG00000198707  | ENSG00000196584 | ENSG00000142798  |
| ENSG00000182372  | ENSG00000265594  |                 | ENSG00000070831  |
| ENSG00000182366  | ENSG00000106477  |                 | ENSG00000162552  |
| ENSG00000174469  | ENSG00000188452  |                 | ENSG00000173372  |
| ENSG00000142156  | ENSG00000000971  |                 | ENSG00000159189  |
| ENSG00000142173  | ENSG00000205403  |                 | ENSG00000173369  |
| ENSG00000163359  | ENSG00000171316  |                 | ENSG00000133216  |
| ENSG00000206561  | ENSG00000188419  |                 | ENSG00000004487  |
| ENSG00000109846  | ENSG00000183196  |                 | ENSG00000142676  |
| ENSG00000160213  | ENSG00000136425  |                 | ENSG00000117308  |
| ENSG00000117984  | ENSG00000145354  |                 | ENSG00000117305  |
| ENSG00000155016  | ENSG00000136026  |                 | ENSG00000179163  |
| ENSG00000172817  | ENSG00000261832  |                 | ENSG00000158055  |
| ENSG00000173402  | ENSG00000138603  |                 | ENSG00000187010  |
| ENSG00000100523  | ENSG00000102805  |                 | ENSG00000188672  |
| ENSG00000098578  | ENSG00000128973  |                 | ENSG00000157978  |
| ENSG00000100150  | ENSG00000182372  |                 | ENSG00000162430  |
| ENSG00000175084  | ENSG00000163646  |                 | ENSG00000158014  |
| ENSG00000198947  | ENSG00000198515  |                 | ENSG00000117682  |
| ENSG00000105993  | ENSG00000144191  |                 | ENSG00000117713  |
| ENSG00000101152  | ENSG00000070729  |                 | ENSG00000060642  |
| ENSG00000079805  | ENSG00000170289  |                 | ENSG00000131910  |
| ENSG00000175920  | ENSG00000158158  |                 | ENSG00000175707  |
| ENSG00000172269  | ENSG00000060718  |                 | ENSG00000090020  |
| ENSG00000000419  | ENSG00000232541  |                 | ENSG00000142748  |
| ENSG00000136908  | ENSG00000204248  |                 | ENSG00000126705  |
| ENSG00000179085  | ENSG00000227801  |                 | ENSG00000159023  |
| ENSG00000149295  | ENSG00000230930  |                 | ENSG00000116353  |
| ENSG00000197102  | ENSG00000206290  |                 | ENSG00000162512  |
| ENSG00000135636  | ENSG00000235708  |                 | ENSG00000160050  |
| ENSG00000096093  | ENSG00000223699  |                 | ENSG00000182866  |
| ENSG00000122877  | ENSG00000182871  |                 | ENSG00000134684  |
| ENSG00000102119  | ENSG00000139219  |                 | ENSG00000121905  |
| ENSG00000112425  | ENSG00000187498  |                 | ENSG00000004455  |
| ENSG00000147475  | ENSG00000130635  |                 | ENSG00000189433  |
| ENSG00000103089  | ENSG00000112280  |                 | ENSG00000188910  |
| ENSG00000139132  | ENSG00000049089  |                 | ENSG00000171812  |
| ENSG0000022267   | ENSG00000092758  |                 | ENSG00000119535  |
| ENSG00000112367  | ENSG00000269983  |                 | ENSG00000163877  |
| ENSG00000181027  | ENSG00000131174  |                 | ENSG00000169218  |
| ENSG00000106692  | ENSG00000134376  |                 | ENSG00000168389  |
| ENSG00000128591  | ENSG00000105392  |                 | ENSG00000131238  |
| ENSG00000110195  | ENSG00000104218  |                 | ENSG00000084073  |
| ENSG00000176165  | ENSG00000101439  |                 | ENSG00000049089  |
| ENSG00000171298  | ENSG00000044115  |                 | ENSG00000117013  |
| ENSG0000022355   | ENSG00000117984  |                 | ENSG00000171793  |
| ENSG00000166206  | ENSG00000174080  |                 | ENSG00000164007  |
| ENSG00000113327  | ENSG00000168329  |                 | ENSG00000117385  |
| ENSG00000130005  | ENSG00000138061  |                 | ENSG00000164010  |
| ENSG00000106105  | ENSG00000135929  |                 | ENSG00000117394  |
| ENSG00000171766  | ENSG00000145476  |                 | ENSG00000117400  |
| ENSG00000070610  | ENSG00000170959  |                 | ENSG00000198198  |
| ENSG00000131979  | ENSG00000058866  |                 | ENSG00000142949  |
| ENSG00000104381  | ENSG00000117682  |                 | ENSG00000126091  |
| ENSG00000198380  | ENSG00000140829  |                 | ENSG00000196517  |
| ENSG00000169562  | ENSG00000101152  |                 | ENSG00000117425  |
| ENSG00000198835  | ENSG00000156171  |                 | ENSG00000070785  |
| ENSG00000173540  | ENSG00000197057  |                 | ENSG00000126088  |
| ENSG00000141404  | ENSG00000115380  |                 | ENSG00000132781  |
| ENSG00000087258  | ENSG00000118402  |                 | ENSG00000132773  |
| ENSG00000114450  | ENSG00000109911  |                 | ENSG00000132763  |
| ENSG00000159921  | ENSG00000127463  |                 | ENSG00000085998  |

ENSG00000108433 ENSG00000225830  
ENSG00000176884 ENSG00000188107  
ENSG00000183454 ENSG00000170264  
ENSG00000273079 ENSG00000140092  
ENSG00000164588 ENSG00000138829  
ENSG00000153187 ENSG00000181027  
ENSG00000106211 ENSG00000106692  
ENSG00000152137 ENSG00000162769  
ENSG00000144381 ENSG00000054598  
ENSG00000214960 ENSG00000176692  
ENSG00000135424 ENSG00000186790  
ENSG00000120071 ENSG00000138759  
ENSG00000234438 ENSG00000164945  
ENSG00000065118 ENSG00000150893  
ENSG00000140015 ENSG00000165694  
ENSG00000177807 ENSG00000266662  
ENSG00000075043 ENSG00000186765  
ENSG00000184156 ENSG00000174804  
ENSG00000107147 ENSG00000184344  
ENSG00000243335 ENSG00000156466  
ENSG00000126012 ENSG00000121634  
ENSG00000164961 ENSG00000264499  
ENSG00000155980 ENSG00000165474  
ENSG00000157119 ENSG00000121742  
ENSG00000239474 ENSG00000114349  
ENSG00000185467 ENSG00000134183  
ENSG00000198910 ENSG00000090581  
ENSG00000196569 ENSG00000101850  
ENSG00000133424 ENSG00000260825  
ENSG00000122367 ENSG00000188888  
ENSG00000108231 ENSG00000155974  
ENSG00000121897 ENSG00000185974  
ENSG00000189067 ENSG00000113262  
ENSG00000160789 ENSG00000030582  
ENSG00000163380 ENSG00000048545  
ENSG00000148356 ENSG00000112599  
ENSG00000015479 ENSG00000132518  
ENSG00000204406 ENSG00000170445  
ENSG00000169057 ENSG00000004961  
ENSG00000104973 ENSG00000164588  
ENSG00000081189 ENSG00000163666  
ENSG00000116688 ENSG00000165102  
ENSG00000164073 ENSG00000156515  
ENSG00000158887 ENSG00000143341  
ENSG00000171100 ENSG00000029993  
ENSG00000080753 ENSG00000269411  
ENSG00000198793 ENSG00000215612  
ENSG00000030304 ENSG00000166033  
ENSG00000111046 ENSG00000101365  
ENSG00000092054 ENSG00000187535  
ENSG00000120729 ENSG00000138002  
ENSG00000104419 ENSG00000100360  
ENSG00000183091 ENSG00000122970  
ENSG00000049759 ENSG00000106348  
ENSG00000277586 ENSG00000112706  
ENSG00000187566 ENSG00000081148  
ENSG00000170113 ENSG00000148384  
ENSG00000179915 ENSG00000119509  
ENSG00000185345 ENSG00000173226  
ENSG00000165194 ENSG00000214960  
ENSG00000067992 ENSG00000136156  
ENSG00000182621 ENSG00000101384  
ENSG00000178209 ENSG000001270408  
ENSG00000123560 ENSG00000115474  
ENSG00000109909 ENSG00000168263  
ENSG00000127838 ENSG00000100578  
ENSG00000039650 ENSG00000122778  
ENSG00000177666 ENSG00000138160  
ENSG00000032444 ENSG00000166813  
ENSG00000108439 ENSG00000122550  
ENSG00000140521 ENSG00000263243  
ENSG00000085998 ENSG00000187242  
ENSG00000144647 ENSG00000101680  
ENSG00000185900 ENSG00000172037  
ENSG00000130714 ENSG00000135338  
ENSG00000009830 ENSG00000213398  
ENSG00000131238 ENSG00000106689  
ENSG00000138078 ENSG00000167210  
ENSG00000139174 ENSG00000121207  
ENSG00000180228 ENSG00000183423  
ENSG00000147224 ENSG00000081479  
ENSG00000167371 ENSG00000162337  
ENSG00000105227 ENSG00000163818  
ENSG00000172053 ENSG00000181541  
ENSG00000075785 ENSG00000178573  
ENSG00000165917 ENSG00000111837  
ENSG00000078328 ENSG00000153208  
ENSG00000167281 ENSG000001235718  
ENSG00000068615 ENSG00000259159  
ENSG00000067836 ENSG00000164073  
ENSG00000125744 ENSG00000207935  
ENSG00000196218 ENSG00000125863  
ENSG00000151835 ENSG00000111443  
ENSG00000133812 ENSG00000132763  
ENSG00000138760 ENSG00000138823  
ENSG00000185313 ENSG00000110921  
ENSG00000144285 ENSG00000261910  
ENSG00000105711 ENSG00000137474  
ENSG00000136531 ENSG00000034971  
ENSG00000153253 ENSG00000102030  
ENSG00000007314 ENSG00000268281  
ENSG00000183873 ENSG00000124479  
ENSG00000196876 ENSG00000117650  
ENSG00000169432 ENSG00000162992  
ENSG00000162430 ENSG00000173614  
ENSG00000108823 ENSG00000144061  
ENSG00000163069 ENSG00000113971  
ENSG00000170624 ENSG00000131697  
ENSG00000127990 ENSG00000031544  
ENSG00000102683 ENSG00000175745  
ENSG00000169247 ENSG00000129535  
ENSG00000147100 ENSG00000188937  
ENSG00000115840 ENSG00000065154  
ENSG00000177542 ENSG00000104044  
ENSG00000117394 ENSG00000046651  
ENSG00000169359 ENSG00000198836  
ENSG00000102100 ENSG00000125741  
ENSG00000142319 ENSG00000123240

ENSG00000085999  
ENSG00000117480  
ENSG00000162367  
ENSG00000123473  
ENSG00000186790  
ENSG00000085840  
ENSG00000116171  
ENSG00000157184  
ENSG00000157193  
ENSG00000116133  
ENSG00000162399  
ENSG00000169174  
ENSG00000157131  
ENSG00000021852  
ENSG00000184292  
ENSG00000162599  
ENSG00000116641  
ENSG00000132855  
ENSG00000187140  
ENSG00000088035  
ENSG00000079739  
ENSG00000116675  
ENSG00000116678  
ENSG00000116704  
ENSG00000162594  
ENSG00000116745  
ENSG00000116761  
ENSG00000116783  
ENSG00000117054  
ENSG00000162614  
ENSG00000124867  
ENSG00000122482  
ENSG00000162669  
ENSG00000174842  
ENSG00000162676  
ENSG00000122406  
ENSG00000023909  
ENSG00000198691  
ENSG00000117528  
ENSG00000172339  
ENSG00000188641  
ENSG00000162688  
ENSG00000117620  
ENSG00000156876  
ENSG00000137992  
ENSG00000079335  
ENSG00000181656  
ENSG00000060718  
ENSG00000121957  
ENSG00000197780  
ENSG00000134243  
ENSG00000065135  
ENSG00000134183  
ENSG00000116337  
ENSG00000156150  
ENSG00000197106  
ENSG00000177301  
ENSG00000156171  
ENSG00000171385  
ENSG00000155380  
ENSG00000198799  
ENSG00000134242  
ENSG00000134262  
ENSG00000116748  
ENSG00000121381  
ENSG00000134200  
ENSG00000134259  
ENSG00000173218  
ENSG00000118729  
ENSG00000143061  
ENSG00000092607  
ENSG00000203859  
ENSG00000092621  
ENSG00000134240  
ENSG00000134250  
ENSG00000131779  
ENSG00000265241  
ENSG00000168509  
ENSG00000265107  
ENSG00000121634  
ENSG00000150337  
ENSG00000143368  
ENSG00000136631  
ENSG00000117360  
ENSG00000143374  
ENSG00000143369  
ENSG00000143382  
ENSG00000143387  
ENSG00000143363  
ENSG00000143373  
ENSG00000143290  
ENSG00000143442  
ENSG00000143365  
ENSG00000159450  
ENSG00000143631  
ENSG00000203782  
ENSG00000143614  
ENSG00000177954  
ENSG00000143549  
ENSG00000143575  
ENSG00000160712  
ENSG00000160716  
ENSG00000160710  
ENSG00000163344  
ENSG00000160688  
ENSG00000179085  
ENSG00000185499  
ENSG00000177628  
ENSG00000143627  
ENSG00000160752  
ENSG00000163374  
ENSG00000143622  
ENSG00000116584  
ENSG00000116586  
ENSG00000160789  
ENSG00000196189  
ENSG00000163382  
ENSG00000143294

ENSG00000130821 ENSG00000238243  
ENSG00000198689 ENSG00000165588  
ENSG00000021574 ENSG00000125779  
ENSG00000104133 ENSG00000075891  
ENSG00000133104 ENSG00000007372  
ENSG00000090487 ENSG00000150275  
ENSG00000197912 ENSG00000132915  
ENSG00000116096 ENSG00000133256  
ENSG00000197694 ENSG00000095464  
ENSG00000102359 ENSG00000156973  
ENSG00000126091 ENSG00000185527  
ENSG00000115525 ENSG00000139053  
ENSG00000185482 ENSG00000186862  
ENSG00000136854 ENSG00000127980  
ENSG00000080656 ENSG00000157911  
ENSG00000131018 ENSG00000131779  
ENSG00000197283 ENSG00000265832  
ENSG00000198198 ENSG00000108733  
ENSG00000162065 ENSG00000162928  
ENSG00000173991 ENSG00000142655  
ENSG00000196628 ENSG00000121680  
ENSG00000196663 ENSG00000162735  
ENSG00000180176 ENSG00000164751  
ENSG00000131931 ENSG00000215193  
ENSG00000116001 ENSG00000034693  
ENSG00000170876 ENSG00000139197  
ENSG00000118600 ENSG00000124587  
ENSG00000105048 ENSG00000112357  
ENSG00000006419 ENSG00000102144  
ENSG00000136827 ENSG00000269666  
ENSG00000143337 ENSG00000107537  
ENSG00000198467 ENSG00000091622  
ENSG00000143549 ENSG00000164093  
ENSG00000166340 ENSG00000107859  
ENSG00000168538 ENSG00000127472  
ENSG00000119401 ENSG00000142731  
ENSG00000111199 ENSG00000032444  
ENSG00000165699 ENSG00000139323  
ENSG00000103197 ENSG00000130714  
ENSG00000155657 ENSG00000009830  
ENSG00000104833 ENSG00000131238  
ENSG00000114062 ENSG00000214140  
ENSG00000139190 ENSG00000007062  
ENSG00000165280 ENSG00000117360  
ENSG00000155975 ENSG00000265228  
ENSG00000186153 ENSG00000273109  
ENSG00000134684 ENSG00000271442  
ENSG00000169554 ENSG00000273462  
ENSG00000072121 ENSG00000272932  
ENSG00000155256 ENSG00000273469  
ENSG00000272964  
ENSG00000273376  
ENSG00000273224  
ENSG00000105618  
ENSG00000273060  
ENSG00000136875  
ENSG00000101161  
ENSG00000174231  
ENSG00000112619  
ENSG00000147224  
ENSG00000099246  
ENSG00000157869  
ENSG00000115839  
ENSG00000118873  
ENSG00000077092  
ENSG00000134438  
ENSG000001173976  
ENSG000001139687  
ENSG00000265203  
ENSG00000107618  
ENSG00000138207  
ENSG00000198570  
ENSG00000072042  
ENSG00000139988  
ENSG00000135437  
ENSG00000148604  
ENSG00000108370  
ENSG00000186326  
ENSG00000163914  
ENSG00000079841  
ENSG00000140522  
ENSG00000149489  
ENSG00000104237  
ENSG00000183638  
ENSG00000271091  
ENSG00000102218  
ENSG00000164610  
ENSG00000116745  
ENSG00000156313  
ENSG00000092200  
ENSG00000103494  
ENSG00000102104  
ENSG00000130347  
ENSG00000130561  
ENSG000000054282  
ENSG00000196189  
ENSG00000164690  
ENSG00000138083  
ENSG00000184302  
ENSG00000074621  
ENSG00000188467  
ENSG00000268928  
ENSG00000100075  
ENSG00000164209  
ENSG00000164175  
ENSG00000088836  
ENSG00000033867  
ENSG00000013293  
ENSG00000198732  
ENSG00000144028  
ENSG00000112335  
ENSG00000181449  
ENSG00000134595  
ENSG00000042317  
ENSG00000072080  
ENSG00000137868  
ENSG00000196628  
ENSG00000204852

ENSG00000198400  
ENSG00000163554  
ENSG00000213088  
ENSG00000143315  
ENSG00000177807  
ENSG00000186255  
ENSG00000143318  
ENSG00000132716  
ENSG00000162735  
ENSG00000122218  
ENSG00000162736  
ENSG00000122223  
ENSG00000158773  
ENSG00000143217  
ENSG00000143224  
ENSG00000158864  
ENSG00000158874  
ENSG00000158877  
ENSG00000143252  
ENSG00000143226  
ENSG00000203747  
ENSG00000162747  
ENSG00000072694  
ENSG00000182127  
ENSG00000162733  
ENSG00000143183  
ENSG00000198821  
ENSG00000143199  
ENSG00000143178  
ENSG00000117479  
ENSG00000198734  
ENSG00000174175  
ENSG00000120370  
ENSG00000116132  
ENSG00000007933  
ENSG00000039771  
ENSG00000117560  
ENSG00000117586  
ENSG00000117593  
ENSG00000117601  
ENSG00000116218  
ENSG00000143337  
ENSG00000121454  
ENSG00000143324  
ENSG00000135821  
ENSG00000135828  
ENSG00000058085  
ENSG00000116701  
ENSG00000198860  
ENSG00000143341  
ENSG00000116690  
ENSG00000116711  
ENSG00000134371  
ENSG00000000971  
ENSG00000116785  
ENSG00000244414  
ENSG00000134389  
ENSG00000143278  
ENSG00000066279  
ENSG00000134376  
ENSG00000084237  
ENSG00000118193  
ENSG00000118197  
ENSG00000081248  
ENSG00000081277  
ENSG00000118194  
ENSG00000077152  
ENSG00000143858  
ENSG00000133048  
ENSG00000133063  
ENSG00000182004  
ENSG00000143839  
ENSG00000170498  
ENSG00000158615  
ENSG00000184144  
ENSG00000133059  
ENSG00000136634  
ENSG00000196352  
ENSG00000117322  
ENSG00000203710  
ENSG00000117335  
ENSG00000196878  
ENSG00000117594  
ENSG00000117595  
ENSG00000143469  
ENSG00000143473  
ENSG00000198570  
ENSG00000117650  
ENSG00000162769  
ENSG00000152104  
ENSG00000117724  
ENSG00000042781  
ENSG00000092969  
ENSG00000196660  
ENSG00000067704  
ENSG00000118873  
ENSG00000187554  
ENSG00000143815  
ENSG00000143819  
ENSG00000143811  
ENSG00000143768  
ENSG00000143801  
ENSG00000163050  
ENSG00000198835  
ENSG00000181873  
ENSG00000143632  
ENSG00000135775  
ENSG00000135744  
ENSG00000173409  
ENSG00000116906  
ENSG00000100072  
ENSG00000135766  
ENSG00000162946  
ENSG00000168275  
ENSG00000116957  
ENSG00000162885  
ENSG00000143669

ENSG00000168778  
ENSG00000119977  
ENSG00000187079  
ENSG00000218336  
ENSG00000105329  
ENSG00000268249  
ENSG00000126953  
ENSG00000100234  
ENSG00000179029  
ENSG00000171202  
ENSG00000149483  
ENSG00000187049  
ENSG000001205084  
ENSG00000155755  
ENSG00000164953  
ENSG00000006042  
ENSG00000197579  
ENSG00000166340  
ENSG00000213689  
ENSG00000119401  
ENSG00000072756  
ENSG00000134160  
ENSG00000106025  
ENSG00000123607  
ENSG00000165533  
ENSG00000119685  
ENSG00000137561  
ENSG00000166402  
ENSG00000137822  
ENSG00000128159  
ENSG00000112041  
ENSG00000077498  
ENSG00000107165  
ENSG00000109103  
ENSG00000006611  
ENSG00000182040  
ENSG000000942781  
ENSG00000148704  
ENSG00000038427  
ENSG00000132549  
ENSG00000119614  
ENSG00000143951  
ENSG00000157796  
ENSG00000109501  
ENSG00000184937  
ENSG00000148516  
ENSG00000169554  
ENSG00000175213  
ENSG00000102935  
ENSG00000225614  
  
ENSG00000186197  
ENSG00000077522  
ENSG00000116984  
ENSG00000198626  
ENSG00000133019  
ENSG00000155816  
ENSG00000180875  
ENSG00000091483  
ENSG00000054282  
ENSG00000117020  
ENSG00000179456  
ENSG00000203667  
ENSG00000153187  
ENSG00000162711  
ENSG00000115705  
ENSG00000130508  
ENSG00000186487  
ENSG00000171865  
ENSG00000171863  
ENSG00000118004  
ENSG00000176887  
ENSG00000134313  
ENSG00000151694  
ENSG00000172059  
ENSG00000115758  
ENSG00000134324  
ENSG00000151779  
ENSG00000134323  
ENSG00000118965  
ENSG00000132031  
ENSG00000084674  
ENSG00000115138  
ENSG00000119772  
ENSG00000143970  
ENSG00000084754  
ENSG00000138029  
ENSG00000157856  
ENSG00000115155  
ENSG00000171303  
ENSG00000084693  
ENSG00000138030  
ENSG00000084774  
ENSG00000115204  
ENSG00000115211  
ENSG00000163795  
ENSG00000138002  
ENSG00000084734  
ENSG00000213639  
ENSG00000179270  
ENSG00000171094  
ENSG00000158125  
ENSG00000277893  
ENSG00000021574  
ENSG00000091106  
ENSG00000138061  
ENSG00000115904  
ENSG00000138036  
ENSG00000138075  
ENSG00000143921  
ENSG00000138095  
ENSG00000138079  
ENSG00000138078  
ENSG00000138083  
ENSG00000116016  
ENSG00000119878  
ENSG00000180398  
ENSG00000068724  
ENSG00000119868  
ENSG00000119888  
ENSG00000095002  
ENSG00000116062  
ENSG00000138039  
ENSG00000170820  
ENSG00000179915  
ENSG00000115355  
ENSG00000138035  
ENSG00000115380  
ENSG00000115392  
ENSG00000119866  
ENSG00000162928  
ENSG00000170264  
ENSG00000115504  
ENSG00000143951  
ENSG00000115902  
ENSG00000169604  
ENSG00000198380  
ENSG00000169599  
ENSG00000116001  
ENSG00000183733  
ENSG00000116031  
ENSG00000116039  
ENSG00000124370  
ENSG00000135636  
ENSG00000003137  
ENSG00000116096  
ENSG00000116127  
ENSG00000124356  
ENSG00000163017  
ENSG00000114956  
ENSG00000163170  
ENSG00000204843  
ENSG00000115275  
ENSG00000115317  
ENSG00000163541  
ENSG00000115459  
ENSG00000115486  
ENSG00000168878  
ENSG00000115525  
  
ENSG00000068615  
ENSG00000153563  
ENSG00000172071  
ENSG00000153574  
  
ENSG00000274286  
ENSG00000135956  
ENSG00000144028  
ENSG00000114988

ENSG00000158158  
ENSG00000115085  
ENSG00000168658  
ENSG00000144191  
ENSG00000183513  
ENSG00000144182  
ENSG00000115665  
ENSG00000153201  
ENSG00000135960  
ENSG00000144061  
ENSG00000169679  
ENSG00000153208  
ENSG00000169607  
ENSG00000125538  
ENSG00000136695  
ENSG00000136689  
ENSG00000125618  
ENSG00000115107  
ENSG00000074047  
ENSG00000264229  
ENSG00000136732  
ENSG00000136717  
ENSG00000163161  
ENSG00000115718  
ENSG00000072163  
ENSG00000136720  
ENSG00000136710  
ENSG00000136698  
ENSG00000115839  
ENSG00000115850  
ENSG00000076003  
ENSG00000115866  
ENSG00000121966  
ENSG00000150540  
ENSG00000115919  
ENSG00000169554  
ENSG00000115947  
ENSG00000204406  
ENSG00000168280  
ENSG00000168288  
ENSG00000183091  
ENSG00000182389  
ENSG00000115159  
ENSG00000115170  
ENSG00000115221  
ENSG00000115267  
ENSG00000136531  
ENSG00000115339  
ENSG00000123607  
ENSG00000144285  
ENSG00000169432  
ENSG00000073734  
ENSG00000081479  
ENSG00000163093  
ENSG00000239474  
ENSG00000128683  
ENSG00000115827  
ENSG00000115840  
ENSG00000091409  
ENSG00000091436  
ENSG00000144354  
ENSG00000115935  
ENSG00000138435  
ENSG00000128656  
ENSG00000128714  
ENSG00000128710  
ENSG00000118510  
ENSG00000128655  
ENSG00000180228  
ENSG00000204311  
ENSG00000155657  
ENSG00000188452  
ENSG00000162992  
ENSG00000162998  
ENSG00000168542  
ENSG00000204262  
ENSG00000138449  
ENSG00000138379  
ENSG00000198130  
ENSG00000115415  
ENSG00000138378  
ENSG00000138411  
ENSG00000197121  
ENSG00000115524  
ENSG00000144381  
ENSG00000247626  
ENSG00000119042  
ENSG00000119013  
ENSG00000003400  
ENSG00000064012  
ENSG00000155755  
ENSG00000003393  
ENSG00000116030  
ENSG00000204217  
ENSG00000163599  
ENSG00000163600  
ENSG00000232228  
ENSG00000118246  
ENSG00000118260  
ENSG00000118231  
ENSG00000163254  
ENSG00000182187  
ENSG00000138413  
ENSG00000115020  
ENSG00000144406  
ENSG0000021826  
ENSG00000178568  
ENSG00000138376  
ENSG00000144452  
ENSG00000138363  
ENSG00000115414  
ENSG00000138375  
ENSG00000163464  
ENSG00000127838  
ENSG0000018280  
ENSG00000074582  
ENSG00000135929  
ENSG00000135925

ENSG00000163499  
ENSG00000163501  
ENSG00000187736  
ENSG00000115657  
ENSG00000127824  
ENSG00000135924  
ENSG00000175084  
ENSG00000072195  
ENSG00000144591  
ENSG00000124006  
ENSG00000135903  
ENSG00000152056  
ENSG00000135900  
ENSG00000036257  
ENSG00000169047  
ENSG00000081052  
ENSG00000169031  
ENSG00000168958  
ENSG00000168955  
ENSG00000135917  
ENSG00000135899  
ENSG00000156973  
ENSG00000144535  
ENSG00000171551  
ENSG00000237412  
ENSG00000135902  
ENSG00000196811  
ENSG00000204120  
ENSG00000115474  
ENSG00000085978  
ENSG00000130561  
ENSG00000241635  
ENSG00000163359  
ENSG00000115648  
ENSG00000132326  
ENSG00000204104  
ENSG00000233608  
ENSG00000130414  
ENSG00000142330  
ENSG00000130294  
ENSG00000172482  
ENSG00000180902  
ENSG00000188389  
ENSG00000072756  
ENSG00000113851  
ENSG00000144455  
ENSG00000150995  
ENSG00000182533  
ENSG00000168137  
ENSG00000163719  
ENSG00000156983  
ENSG00000114026  
ENSG00000187288  
ENSG00000171135  
ENSG00000163702  
ENSG00000163703  
ENSG00000144554  
ENSG00000134086  
ENSG00000157017  
ENSG00000157087  
ENSG00000157103  
ENSG00000157152  
ENSG00000132170  
ENSG00000154743  
ENSG00000132155  
ENSG00000154764  
ENSG00000170876  
ENSG00000154767  
ENSG00000154781  
ENSG00000206561  
ENSG00000169814  
ENSG00000092345  
ENSG00000129810  
ENSG00000174748  
ENSG00000151090  
ENSG00000077092  
ENSG00000151092  
ENSG00000163513  
ENSG00000163527  
ENSG00000152642  
ENSG00000170266  
ENSG00000170275  
ENSG00000076242  
ENSG00000187091  
ENSG00000172936  
ENSG00000114739  
ENSG00000183873  
ENSG00000185313  
ENSG00000168356  
ENSG00000168329  
ENSG00000144659  
ENSG00000168028  
ENSG00000168036  
ENSG00000157119  
ENSG00000144647  
ENSG00000160746  
ENSG0000011198  
ENSG0000011376  
ENSG00000163817  
ENSG00000163818  
ENSG00000163820  
ENSG00000121807  
ENSG00000160791  
ENSG00000241186  
ENSG00000181585  
ENSG00000160808  
ENSG00000160801  
ENSG00000160796  
ENSG00000181555  
ENSG00000213689  
ENSG00000114270  
ENSG00000178537  
ENSG00000178057  
ENSG00000178035  
ENSG00000172053  
ENSG00000172037  
ENSG00000185909  
ENSG00000145020

ENSG00000173402  
ENSG00000173540  
ENSG00000183763  
ENSG00000164078  
ENSG00000114349  
ENSG00000114353  
ENSG00000114378  
ENSG00000004838  
ENSG00000114388  
ENSG00000114737  
ENSG00000114738  
ENSG000001243989  
ENSG000001164087  
ENSG00000168237  
ENSG00000163930  
ENSG00000114854  
ENSG000000055955  
ENSG00000163933  
ENSG00000163932  
ENSG00000163931  
ENSG00000157388  
ENSG00000114251  
ENSG00000144730  
ENSG00000163666  
ENSG00000157500  
ENSG00000136068  
ENSG00000163687  
ENSG00000168291  
ENSG00000168306  
ENSG00000163635  
ENSG00000144741  
ENSG00000163378  
ENSG00000163380  
ENSG00000187098  
ENSG00000114861  
ENSG00000163421  
ENSG00000185008  
ENSG00000114480  
ENSG000000083937  
ENSG000000064835  
ENSG00000184500  
ENSG00000169379  
ENSG00000113966  
ENSG000000080819  
ENSG00000114354  
ENSG000000081148  
ENSG00000174173  
ENSG00000153283  
ENSG00000114573  
ENSG00000151577  
ENSG00000181722  
ENSG000000031081  
ENSG00000163389  
ENSG00000113845  
ENSG00000113924  
ENSG00000173226  
ENSG00000145103  
ENSG000000036828  
ENSG00000121552  
ENSG00000173175  
ENSG000000065534  
ENSG00000160145  
ENSG00000114491  
ENSG00000163848  
ENSG00000159650  
ENSG000000073111  
ENSG000000058262  
ENSG00000179348  
ENSG000000075785  
ENSG00000177646  
ENSG00000169704  
ENSG00000169714  
ENSG00000163913  
ENSG00000163914  
ENSG0000017260  
ENSG00000114686  
ENSG000000081307  
ENSG00000113971  
ENSG00000170819  
ENSG000000091513  
ENSG00000174640  
ENSG00000182923  
ENSG00000174611  
ENSG00000114054  
ENSG00000183770  
ENSG00000175110  
ENSG00000175054  
ENSG00000181804  
ENSG00000152952  
ENSG00000152977  
ENSG00000144891  
ENSG00000163754  
ENSG00000163755  
ENSG000000047457  
ENSG00000163646  
ENSG00000169313  
ENSG00000196549  
ENSG00000169359  
ENSG00000168827  
ENSG000000068885  
ENSG00000169255  
ENSG000000090402  
ENSG00000114200  
ENSG00000114209  
ENSG00000163536  
ENSG000000085276  
ENSG000000013293  
ENSG00000163581  
ENSG00000154310  
ENSG000000075651  
ENSG00000121853  
ENSG00000144962  
ENSG00000177565  
ENSG00000121879  
ENSG00000114450  
ENSG00000145075  
ENSG00000205981  
ENSG00000181449

ENSG00000078070  
ENSG00000114796  
ENSG00000145191  
ENSG00000161202  
ENSG00000214160  
ENSG00000114867  
ENSG00000114859  
ENSG00000090534  
ENSG00000113790  
ENSG00000163898  
ENSG00000073792  
ENSG00000213139  
ENSG00000113905  
ENSG00000113889  
ENSG00000181092  
ENSG00000127241  
ENSG00000145012  
ENSG00000073282  
ENSG00000090530  
ENSG00000163347  
ENSG00000113946  
ENSG00000152492  
ENSG00000114279  
ENSG00000198836  
ENSG00000072274  
ENSG00000161217  
ENSG00000213123  
ENSG00000163961  
ENSG00000174007  
ENSG00000145016  
ENSG00000182899  
ENSG00000131127  
ENSG00000174227  
ENSG00000133256  
ENSG00000145217  
ENSG00000127415  
ENSG00000178222  
ENSG00000163945  
ENSG00000068078  
ENSG00000185818  
ENSG00000087266  
ENSG00000087274  
ENSG00000197386  
ENSG00000175920  
ENSG00000163956  
ENSG00000184160  
ENSG00000163132  
ENSG00000173040  
ENSG00000072840  
ENSG00000109501  
ENSG00000215612  
ENSG00000109667  
ENSG00000169676  
ENSG00000157869  
ENSG00000109705  
ENSG00000048342  
ENSG0000007062  
ENSG00000169762  
ENSG00000151552  
ENSG00000109610  
ENSG00000109618  
ENSG00000157765  
ENSG00000168214  
ENSG00000174125  
ENSG00000157796  
ENSG00000121897  
ENSG00000154277  
ENSG00000109132  
ENSG00000215203  
ENSG00000151806  
ENSG00000151834  
ENSG00000163288  
ENSG00000145244  
ENSG00000198515  
ENSG00000163069  
ENSG00000109220  
ENSG00000134853  
ENSG00000157404  
ENSG00000128052  
ENSG00000128039  
ENSG00000134851  
ENSG00000174799  
ENSG00000174780  
ENSG00000084093  
ENSG00000163453  
ENSG00000205678  
ENSG00000109163  
ENSG00000197888  
ENSG00000171195  
ENSG00000178522  
ENSG00000132464  
ENSG00000080493  
ENSG00000163631  
ENSG00000081051  
ENSG00000174792  
ENSG00000138760  
ENSG00000138759  
ENSG00000163297  
ENSG00000152784  
ENSG00000138675  
ENSG00000152795  
ENSG00000173085  
ENSG00000163625  
ENSG00000152591  
ENSG00000152592  
ENSG00000118762  
ENSG00000118777  
ENSG00000163644  
ENSG00000255072  
ENSG00000145335  
ENSG00000152208  
ENSG00000163104  
ENSG00000138696  
ENSG00000138698  
ENSG00000151247  
ENSG00000196616  
ENSG00000248144  
ENSG00000145331



ENSG00000138823  
ENSG00000138821  
ENSG00000109320  
ENSG00000109323  
ENSG00000145354  
ENSG00000138778  
ENSG00000169836  
ENSG00000168769  
ENSG00000138777  
ENSG00000145348  
ENSG00000164022  
ENSG00000155016  
ENSG00000138796  
ENSG00000138795  
ENSG00000188517  
ENSG00000205403  
ENSG00000183423  
ENSG00000138798  
ENSG00000164093  
ENSG00000174720  
ENSG00000145362  
ENSG00000164099  
ENSG00000150961  
ENSG00000172399  
ENSG00000138738  
ENSG00000164111  
ENSG00000138686  
ENSG00000138741  
ENSG00000138684  
ENSG00000181004  
ENSG00000145375  
ENSG00000196159  
ENSG00000142731  
ENSG00000164073  
ENSG00000172007  
ENSG00000109424  
ENSG00000250361  
ENSG00000170180  
ENSG00000151611  
ENSG00000151617  
ENSG00000151623  
ENSG00000198589  
ENSG00000181541  
ENSG00000109654  
ENSG00000137462  
ENSG00000171564  
ENSG00000171560  
ENSG00000171557  
ENSG00000121207  
ENSG00000164116  
ENSG00000109738  
ENSG00000171503  
ENSG00000052802  
ENSG00000038295  
ENSG00000129116  
ENSG00000137601  
ENSG00000164120  
ENSG00000150630  
ENSG00000038002  
ENSG00000218336  
ENSG00000168538  
ENSG00000164306  
ENSG00000151729  
ENSG00000109775  
ENSG00000164342  
ENSG00000145476  
ENSG00000164344  
ENSG00000088926  
ENSG00000073578  
ENSG00000066230  
ENSG00000174358  
ENSG00000164362  
ENSG00000142319  
ENSG00000145494  
ENSG00000037474  
ENSG00000124275  
ENSG00000150753  
ENSG00000039139  
ENSG00000038382  
ENSG00000154124  
ENSG00000154122  
ENSG00000154153  
ENSG00000164175  
ENSG00000242110  
ENSG00000168724  
ENSG00000113492  
ENSG00000113494  
ENSG00000168685  
ENSG00000152620  
ENSG00000079215  
ENSG00000164190  
ENSG00000197603  
ENSG00000113569  
ENSG00000168621  
ENSG00000113594  
ENSG00000145623  
ENSG00000082074  
ENSG00000113600  
ENSG00000112936  
ENSG00000039537  
ENSG00000083720  
ENSG00000112964  
ENSG00000112992  
ENSG00000070193  
ENSG00000164588  
ENSG00000164172  
ENSG00000164258  
ENSG00000169271  
ENSG00000152669  
ENSG00000164509  
ENSG00000095015  
ENSG00000113448  
ENSG00000049167  
ENSG00000164182  
ENSG00000130449  
ENSG00000068796  
ENSG00000178394  
ENSG00000153015

ENSG00000145675  
ENSG00000152939  
ENSG00000197822  
ENSG00000205571  
ENSG00000172062  
ENSG00000131844  
ENSG00000164326  
ENSG00000049860  
ENSG00000113161  
ENSG00000113163  
ENSG00000113231  
ENSG00000132842  
ENSG00000113275  
ENSG00000132837  
ENSG00000228716  
ENSG00000113318  
ENSG00000186468  
ENSG00000152422  
ENSG00000038427  
ENSG00000145715  
ENSG00000081189  
ENSG00000164199  
ENSG00000175745  
ENSG00000198677  
ENSG00000175426  
ENSG00000153113  
ENSG00000164209  
ENSG00000134987  
ENSG00000134982  
ENSG00000171444  
ENSG00000133835  
ENSG00000113083  
ENSG00000061455  
ENSG00000168944  
ENSG00000164904  
ENSG00000113368  
ENSG00000145794  
ENSG00000138629  
ENSG00000169567  
ENSG00000186687  
ENSG00000164398  
ENSG00000072682  
ENSG00000131435  
ENSG00000197208  
ENSG00000197375  
ENSG00000125347  
ENSG00000113522  
ENSG00000169194  
ENSG00000164405  
ENSG00000072364  
ENSG00000152700  
ENSG00000069011  
ENSG00000120708  
ENSG00000146021  
ENSG00000120729  
ENSG00000132563  
ENSG00000113013  
ENSG00000044115  
ENSG00000120725  
ENSG0000015479  
ENSG00000184584  
ENSG00000185129  
ENSG00000131495  
ENSG00000170445  
ENSG00000112855  
ENSG00000131504  
ENSG00000187678  
ENSG00000145819  
ENSG00000113580  
ENSG00000204928  
ENSG00000133706  
ENSG00000091010  
ENSG00000156475  
ENSG00000164266  
ENSG00000164265  
ENSG00000133710  
ENSG00000145868  
ENSG00000169252  
ENSG00000169247  
ENSG00000155846  
ENSG00000132915  
ENSG00000155850  
ENSG00000182578  
ENSG00000113721  
ENSG00000070814  
ENSG00000164587  
ENSG00000070614  
ENSG00000237693  
ENSG00000196743  
ENSG00000186635  
ENSG00000113140  
ENSG00000145888  
ENSG00000170624  
ENSG00000113249  
ENSG00000113263  
ENSG00000172548  
ENSG00000113302  
ENSG00000022355  
ENSG00000113327  
ENSG00000072571  
ENSG00000113645  
ENSG00000113643  
ENSG00000134516  
ENSG00000168269  
ENSG00000145936  
ENSG00000181163  
ENSG00000174705  
ENSG00000183072  
ENSG00000120149  
ENSG00000074317  
ENSG00000160867  
ENSG00000165671  
ENSG00000131183  
ENSG00000131187  
ENSG00000183258  
ENSG00000027847  
ENSG00000175325  
ENSG00000145912

ENSG00000175309  
ENSG00000113262  
ENSG00000087116  
ENSG00000161011  
ENSG00000037280  
ENSG00000137265  
ENSG00000054598  
ENSG00000124570  
ENSG00000137267  
ENSG00000137285  
ENSG00000214113  
ENSG00000145982  
ENSG00000124491  
ENSG00000096696  
ENSG00000137203  
ENSG00000111846  
ENSG00000111837  
ENSG00000124827  
ENSG00000078401  
ENSG00000145979  
ENSG00000047579  
ENSG00000124788  
ENSG00000187566  
ENSG00000137364  
ENSG00000145996  
ENSG00000146038  
ENSG00000112294  
ENSG00000111802  
ENSG00000112312  
ENSG00000111913  
ENSG00000124564  
ENSG00000010704  
ENSG00000168298  
ENSG00000204701  
ENSG00000204655  
ENSG00000204644  
ENSG00000206503  
ENSG00000196230  
ENSG00000137411  
ENSG00000204539  
ENSG00000204525  
ENSG00000234745  
ENSG00000204498  
ENSG00000226979  
ENSG00000232810  
ENSG00000204475  
ENSG00000204420  
ENSG00000204410  
ENSG00000204386  
ENSG00000166278  
ENSG00000243649  
ENSG00000204351  
ENSG00000244731  
ENSG00000224389  
ENSG00000231852  
ENSG00000168477  
ENSG00000204290  
ENSG00000196126  
ENSG00000196735  
ENSG00000179344  
ENSG00000204267  
ENSG00000204264  
ENSG00000168394  
ENSG00000223865  
ENSG00000204248  
ENSG00000231925  
ENSG00000197283  
ENSG00000137288  
ENSG00000161904  
ENSG00000137309  
ENSG00000124614  
ENSG00000112039  
ENSG00000112041  
ENSG00000096060  
ENSG00000197753  
ENSG00000112053  
ENSG00000180316  
ENSG00000124615  
ENSG00000095970  
ENSG00000048545  
ENSG00000112599  
ENSG00000112619  
ENSG00000124713  
ENSG00000124587  
ENSG00000112640  
ENSG00000044090  
ENSG00000171453  
ENSG00000170734  
ENSG00000172426  
ENSG00000112715  
ENSG00000124608  
ENSG00000124813  
ENSG00000112782  
ENSG00000146070  
ENSG00000198087  
ENSG00000146085  
ENSG00000112077  
ENSG0000008196  
ENSG00000170927  
ENSG00000112116  
ENSG00000096093  
ENSG00000112144  
ENSG00000012660  
ENSG0000001084  
ENSG00000151914  
ENSG00000112210  
ENSG00000188107  
ENSG00000168216  
ENSG00000112280  
ENSG00000079841  
ENSG00000203908  
ENSG00000135297  
ENSG00000119899  
ENSG00000111799  
ENSG00000196586  
ENSG00000112706  
ENSG00000135338  
ENSG00000118402

ENSG00000083123  
ENSG00000013375  
ENSG00000203877  
ENSG00000135324  
ENSG00000112837  
ENSG00000135318  
ENSG00000135317  
ENSG00000164414  
ENSG00000146282  
ENSG00000135341  
ENSG00000123545  
ENSG00000112234  
  
ENSG00000112246  
ENSG00000164418  
ENSG00000085382  
ENSG00000112276  
ENSG00000130347  
ENSG00000164494  
ENSG00000112320  
ENSG00000025796  
ENSG00000081087  
ENSG00000135535  
ENSG00000112365  
ENSG00000112367  
ENSG00000056972  
ENSG00000112761  
ENSG00000112769  
ENSG00000123500  
ENSG00000240050  
ENSG00000189241  
ENSG00000111834  
ENSG00000185002  
ENSG00000153989  
ENSG00000198523  
ENSG00000111877  
ENSG00000152661  
ENSG00000186439  
ENSG00000196569  
ENSG00000118520  
ENSG00000112282  
ENSG00000197594  
ENSG00000112299  
ENSG00000112319  
ENSG00000118513  
ENSG00000135541  
ENSG00000112357  
ENSG00000027697  
ENSG00000118503  
ENSG00000164442  
ENSG00000112414  
ENSG0000010818  
ENSG00000034693  
ENSG00000135604  
ENSG00000112425  
ENSG00000152822  
ENSG00000055208  
ENSG00000177688  
ENSG00000009765  
ENSG00000155906  
ENSG00000091831  
ENSG00000131018  
ENSG00000049618  
ENSG00000122335  
ENSG00000272047  
ENSG00000130363  
ENSG00000112096  
ENSG00000197081  
ENSG00000198670  
ENSG00000122194  
ENSG00000185345  
ENSG00000112541  
ENSG00000164458  
ENSG00000060762  
ENSG00000026297  
ENSG00000112562  
ENSG00000186340  
ENSG00000130023  
ENSG00000112592  
ENSG00000177706  
ENSG00000164818  
ENSG0000002822  
ENSG00000106003  
ENSG00000106009  
ENSG00000198286  
ENSG00000242802  
ENSG00000075624  
ENSG0000011275  
ENSG00000122512  
ENSG00000106415  
ENSG00000214960  
ENSG00000122691  
ENSG00000105877  
ENSG00000136244  
ENSG00000122591  
ENSG00000122550  
ENSG00000105928  
ENSG00000172115  
ENSG00000122566  
ENSG00000086300  
ENSG00000105991  
ENSG00000105996  
ENSG0000005073  
ENSG00000106031  
ENSG00000106080  
ENSG00000106105  
ENSG00000240583  
ENSG00000106128  
ENSG00000106341  
ENSG00000122643  
ENSG00000164610  
ENSG00000122507  
ENSG00000164619  
ENSG00000187258  
ENSG00000164532  
ENSG0000011426  
ENSG00000086288  
ENSG00000106483

ENSG00000106536  
ENSG00000065883  
ENSG00000168303  
ENSG00000175600  
ENSG00000106571  
ENSG00000106605  
ENSG00000164708  
ENSG00000106633  
ENSG00000015520  
ENSG00000136280  
ENSG00000164742  
ENSG00000158683  
ENSG00000185811  
ENSG00000132437  
ENSG00000146648  
ENSG00000146733  
ENSG00000106153  
ENSG00000169919  
ENSG00000126522  
ENSG00000243335  
ENSG00000126524  
ENSG00000158321  
ENSG00000049540  
ENSG00000158517  
ENSG00000127948  
ENSG00000146701  
ENSG00000106211  
ENSG00000127947  
ENSG00000135218  
ENSG00000019991  
ENSG00000186472  
ENSG00000170381  
ENSG00000075213  
ENSG00000005471  
ENSG00000085563  
ENSG00000127914  
ENSG00000001631  
ENSG00000157259  
ENSG00000127980  
ENSG00000105810  
ENSG00000205413  
ENSG00000177409  
ENSG00000004948  
ENSG00000164692  
ENSG00000127990  
ENSG00000005421  
ENSG00000105854  
ENSG00000004864  
ENSG00000105880  
ENSG00000070669  
ENSG00000106258  
ENSG00000221838  
ENSG00000106290  
ENSG00000066923  
ENSG00000106327  
ENSG00000130427  
ENSG00000196411  
ENSG00000087085  
ENSG00000106366  
ENSG00000106367  
ENSG00000106397  
ENSG00000170615  
ENSG00000189056  
ENSG00000164597  
ENSG00000091137  
ENSG00000091138  
ENSG00000091140  
ENSG00000091136  
ENSG00000135241  
ENSG00000154415  
ENSG00000128573  
ENSG00000105974  
ENSG00000105976  
ENSG00000001626  
ENSG00000106025  
ENSG00000008311  
ENSG00000128610  
ENSG00000128519  
ENSG00000128513  
ENSG00000106331  
ENSG00000174697  
ENSG00000106344  
ENSG00000106348  
ENSG00000128617  
ENSG00000128591  
ENSG00000128604  
ENSG00000064419  
ENSG00000128602  
ENSG00000199158  
ENSG00000106477  
ENSG00000172331  
ENSG00000155561  
ENSG00000122787  
ENSG00000105929  
ENSG00000059377  
ENSG00000157764  
ENSG0000006530  
ENSG00000257138  
ENSG00000204983  
ENSG00000275896  
ENSG00000197993  
ENSG00000188037  
ENSG00000106410  
ENSG00000196511  
ENSG00000174469  
ENSG00000106462  
ENSG00000055118  
ENSG00000164867  
ENSG00000164885  
ENSG00000146926  
ENSG00000106617  
ENSG00000196584  
ENSG00000130226  
ENSG00000164690  
ENSG00000105983  
ENSG00000130675  
ENSG00000105993  
ENSG00000126870

ENSG00000182372  
ENSG00000104728  
ENSG00000147316  
ENSG00000183638  
ENSG00000136573  
ENSG00000136574  
ENSG00000164741  
ENSG00000104723  
ENSG00000038945  
ENSG00000078579  
ENSG00000155975  
ENSG00000104213  
ENSG00000104763  
ENSG00000156006  
ENSG00000175445  
ENSG00000147416  
ENSG00000061337  
ENSG00000158815  
ENSG00000168453  
ENSG00000168484  
ENSG00000168487  
ENSG00000104635  
ENSG00000120889  
ENSG00000180053  
ENSG00000277586  
ENSG00000147437  
ENSG00000120903  
ENSG00000120915

ENSG00000171320  
ENSG00000012232  
ENSG00000197265  
ENSG00000165392  
ENSG00000129696  
ENSG00000147475  
ENSG00000147471  
ENSG00000188778  
ENSG00000147465  
ENSG00000085788  
ENSG00000147548  
ENSG00000077782  
ENSG00000168615  
ENSG00000029534  
ENSG00000083168  
ENSG00000104365  
ENSG00000168575  
ENSG00000131931  
ENSG00000120925  
ENSG00000185900  
ENSG00000165102  
ENSG00000253729  
ENSG00000104738  
ENSG00000019549  
ENSG00000023287  
ENSG00000164736  
ENSG00000104237  
ENSG00000181690  
ENSG00000104331  
ENSG00000178538  
ENSG00000171316  
ENSG00000198363  
ENSG00000137561  
ENSG00000172817  
ENSG00000104218  
ENSG00000165078  
ENSG00000104313  
ENSG00000104321  
ENSG00000175606  
ENSG00000104369  
ENSG00000104381  
ENSG00000164751  
ENSG00000133731  
ENSG00000104267  
ENSG00000170289  
ENSG00000104320  
ENSG00000155100  
ENSG00000164953  
ENSG00000164951  
ENSG00000265817  
ENSG00000156170  
ENSG00000156172  
ENSG00000156466  
ENSG00000156467  
ENSG00000156471  
ENSG00000104356  
ENSG00000132549  
ENSG00000104450  
ENSG00000093307  
ENSG00000048392  
ENSG00000164930  
ENSG00000164932  
ENSG00000164933  
ENSG00000147647  
ENSG00000169946  
ENSG00000174417  
ENSG00000104447  
ENSG00000164754  
ENSG00000164756  
ENSG00000182197  
ENSG00000164761  
ENSG00000184374  
ENSG00000064313  
ENSG00000170881  
ENSG00000147684  
ENSG00000164961  
ENSG00000156831  
ENSG00000136997  
ENSG00000184156  
ENSG00000129295  
ENSG00000042832  
ENSG00000104419  
ENSG00000066827  
ENSG00000169427  
ENSG00000167632  
ENSG00000126233  
ENSG00000160882  
ENSG00000179142  
ENSG00000277494

ENSG00000180921  
ENSG00000179950  
ENSG00000178209  
ENSG00000178814  
ENSG00000179091  
ENSG00000185000  
ENSG00000185803  
ENSG00000147804  
ENSG00000160957  
ENSG00000107099  
ENSG00000107104  
ENSG000000080503  
ENSG00000147852  
ENSG00000168263  
ENSG00000107249  
ENSG00000106688  
ENSG000000096968  
ENSG00000178445  
ENSG00000107165  
ENSG00000107186  
ENSG00000164946  
ENSG00000009810  
ENSG00000147889  
ENSG00000137055  
ENSG000000096872  
ENSG00000120156  
ENSG00000147894  
ENSG00000107201  
ENSG00000197579  
ENSG00000137074  
ENSG000000086062  
ENSG00000165269  
ENSG00000165272  
ENSG00000122735  
ENSG00000147955  
ENSG0000013930  
ENSG00000137070  
ENSG00000165280  
ENSG00000121829  
ENSG00000165282  
ENSG000000269900  
ENSG00000198467  
ENSG000000070610  
ENSG00000159899  
ENSG00000159921  
ENSG00000196092  
ENSG00000137106  
ENSG00000107371  
ENSG00000165059  
ENSG00000165060  
ENSG00000119139  
ENSG00000207935  
ENSG00000165091  
ENSG00000119121  
ENSG00000197969  
ENSG00000156052  
ENSG00000148019  
ENSG00000135069  
ENSG00000165119  
ENSG00000148053  
ENSG00000187742  
ENSG00000148090  
ENSG00000169071  
ENSG000000090054  
ENSG00000196305  
ENSG00000106819  
ENSG00000185963  
ENSG00000165140  
ENSG00000158169  
ENSG00000185920  
ENSG00000182150  
ENSG00000130948  
ENSG00000196116  
ENSG00000136936  
ENSG00000178919  
ENSG000000095380  
ENSG00000136928  
ENSG00000165138  
ENSG00000119514  
ENSG00000106799  
ENSG00000119523  
ENSG00000119508  
ENSG00000119509  
ENSG00000136881  
ENSG00000136872  
ENSG00000165029  
ENSG00000106692  
ENSG00000186051  
ENSG000000095209  
ENSG000000070061  
ENSG000000260230  
ENSG000000030304  
ENSG00000136875  
ENSG00000148218  
ENSG00000196739  
ENSG000000095397  
ENSG000000041982  
ENSG00000119401  
ENSG00000136861  
ENSG00000106804  
ENSG00000148180  
ENSG00000148204  
ENSG00000136931  
ENSG00000136944  
ENSG00000148356  
ENSG00000136854  
ENSG00000284547  
ENSG00000106991  
ENSG00000106992  
ENSG00000136908  
ENSG00000106976  
ENSG00000167113  
ENSG00000167114  
ENSG00000119392  
ENSG00000197694  
ENSG00000119323  
ENSG00000136802  
ENSG00000175283

ENSG00000136827  
ENSG00000130707  
ENSG00000130711  
ENSG00000097007  
ENSG00000050555  
ENSG00000126883  
ENSG00000130714  
ENSG00000107290  
ENSG00000165699  
ENSG00000165702  
ENSG00000170835  
ENSG00000175164  
ENSG00000148290  
ENSG00000160323  
ENSG00000197859  
ENSG00000123454  
ENSG00000123453  
ENSG00000130635  
ENSG00000107147  
ENSG00000107187  
ENSG00000187796  
ENSG00000165688  
ENSG00000148384  
ENSG00000148400  
ENSG00000169692  
ENSG00000177239  
ENSG00000176884  
ENSG00000176058  
ENSG00000198569  
ENSG00000165802  
ENSG00000181090  
ENSG00000148408  
ENSG00000261456  
ENSG00000015171  
ENSG00000067082  
ENSG00000151632  
ENSG00000198610  
ENSG00000134460  
ENSG00000107485  
ENSG00000181192  
ENSG00000123240  
ENSG00000107537  
ENSG00000151474  
ENSG00000152457  
ENSG00000077943  
ENSG00000107611  
ENSG00000026025  
ENSG00000165995  
ENSG00000078403  
ENSG00000168267  
ENSG00000095777  
ENSG00000148459  
ENSG00000107890  
ENSG00000136758  
ENSG00000099246  
ENSG00000169126  
ENSG00000095787  
ENSG00000107951  
ENSG00000107968  
ENSG00000148516  
ENSG00000165733  
ENSG00000165731  
ENSG00000107562  
ENSG00000012779  
ENSG00000026369  
ENSG000000263761  
ENSG000000265203  
ENSG000000225830  
ENSG00000070748  
ENSG00000187714  
ENSG00000185532  
ENSG00000165471  
ENSG00000150275  
ENSG00000108064  
ENSG00000122870  
ENSG00000151150  
ENSG00000138311  
ENSG00000122877  
ENSG00000183230  
ENSG00000108176  
ENSG00000138347  
ENSG00000179774  
ENSG00000138346  
ENSG00000165730  
ENSG00000198954  
ENSG00000156515  
ENSG00000122859  
ENSG00000197467  
ENSG00000156574  
ENSG00000180644  
ENSG00000166228  
ENSG00000198246  
ENSG00000107736  
ENSG00000197746  
ENSG00000122863  
ENSG00000138303  
ENSG00000107745  
ENSG00000182180  
ENSG00000122861  
ENSG00000035403  
ENSG00000156110  
ENSG00000156650  
ENSG00000148655  
ENSG00000156113  
ENSG00000148606  
ENSG00000138326  
ENSG00000185303  
ENSG00000122852  
ENSG00000151224  
ENSG00000148600  
ENSG00000148604  
ENSG00000122367  
ENSG00000107779  
ENSG00000148672  
ENSG00000107789  
ENSG00000198682  
ENSG00000227268  
ENSG00000171862



ENSG00000204020  
ENSG00000107796  
ENSG00000026103  
ENSG00000107798  
ENSG00000152779  
ENSG00000138160  
ENSG00000187553  
ENSG00000186188  
ENSG00000138207  
ENSG00000095464  
ENSG00000108231  
ENSG00000138193  
ENSG00000119969  
ENSG00000165841  
ENSG00000138109  
ENSG00000138115  
ENSG00000095973  
ENSG00000119977  
ENSG00000138185  
ENSG00000095585  
ENSG00000241935  
ENSG00000155256  
ENSG00000107521  
ENSG00000172987  
ENSG00000120053  
ENSG0000014919  
ENSG00000023839  
ENSG00000120054  
ENSG00000107566  
ENSG00000213341  
ENSG00000095485  
ENSG00000075891  
ENSG00000107815  
ENSG00000186862  
ENSG00000107831  
ENSG00000166189  
ENSG00000107859  
ENSG00000077150  
ENSG00000107882  
ENSG00000148795  
ENSG00000148842  
ENSG00000076685  
ENSG00000107960  
ENSG00000065618  
ENSG00000148700  
ENSG00000119950  
ENSG00000108055  
ENSG00000203867  
ENSG00000214413  
ENSG00000108061  
ENSG00000148737  
ENSG00000148702  
ENSG00000043591  
ENSG00000175535  
ENSG00000148704  
ENSG00000186795  
ENSG00000170370  
ENSG00000188613  
ENSG00000183605  
ENSG00000151929  
ENSG00000120008  
ENSG00000066468  
ENSG00000254636  
ENSG00000166033  
ENSG00000196177  
ENSG00000065154  
ENSG00000154485  
ENSG00000188690  
ENSG00000108001  
ENSG00000148826  
ENSG00000127884  
ENSG00000171772  
  
ENSG00000206013  
ENSG00000142089  
ENSG00000174775  
ENSG00000185507  
ENSG00000069696  
ENSG00000177030  
ENSG00000177156  
ENSG00000177542  
ENSG00000177666  
ENSG00000177697  
ENSG00000117983  
ENSG00000117984  
ENSG00000130598  
ENSG00000130595  
ENSG00000130600  
ENSG00000167244  
ENSG00000254647  
ENSG00000180176  
ENSG00000110651  
ENSG00000053918  
ENSG00000269821  
ENSG00000129757  
ENSG00000110628  
ENSG00000148985  
ENSG00000167323  
ENSG00000244734  
ENSG00000223609  
ENSG00000213934  
ENSG00000196565  
  
ENSG00000166311  
ENSG00000166340  
ENSG00000166341  
ENSG00000166402  
ENSG00000184014  
ENSG00000133812  
ENSG00000133805  
ENSG00000187079  
ENSG00000152266  
ENSG00000197601  
ENSG00000133818  
ENSG00000186104  
ENSG00000187486  
ENSG0000006071  
ENSG0000006611

ENSG00000188162  
ENSG00000129159  
ENSG00000110756  
ENSG00000134333  
ENSG00000074319  
ENSG00000129170  
ENSG00000165970  
ENSG00000171714  
ENSG00000183161  
ENSG00000134343  
ENSG00000205213  
ENSG00000176697  
ENSG00000131808  
ENSG00000105911  
ENSG00000007372  
ENSG00000184937  
ENSG00000085063  
ENSG00000121691  
ENSG00000110435  
ENSG00000026508  
ENSG00000110436  
ENSG00000166326  
ENSG00000166349  
ENSG00000175097  
ENSG00000151348  
ENSG00000052850  
ENSG00000181830  
ENSG00000121653  
ENSG00000121680  
ENSG00000175213  
ENSG00000180210  
ENSG00000134569  
ENSG00000134574  
ENSG00000134571  
ENSG00000165915  
ENSG00000165917  
ENSG00000123619  
ENSG00000149177  
ENSG00000149131  
ENSG00000172409  
ENSG00000189057  
ENSG00000166801  
ENSG00000134812  
ENSG00000149534  
ENSG00000156738  
ENSG00000149506  
ENSG00000149483  
ENSG00000187049  
ENSG00000167985  
ENSG00000167995  
ENSG00000167996  
ENSG00000149489  
ENSG00000149541  
ENSG00000089597  
ENSG00000204922  
ENSG00000168000  
ENSG00000184743  
ENSG00000176340  
ENSG00000149781  
ENSG00000197891  
ENSG00000068831  
ENSG00000068976  
ENSG00000133895  
ENSG00000142216  
ENSG00000142186  
ENSG00000168056  
ENSG00000172922  
ENSG00000172638  
ENSG00000172500  
ENSG00000175334  
ENSG00000175294  
ENSG00000175115  
ENSG00000174996  
ENSG00000174684  
ENSG00000174483  
ENSG00000248746  
ENSG00000174080  
ENSG00000173898  
ENSG00000173599  
ENSG00000175505  
ENSG00000175544  
ENSG00000110711  
ENSG00000167791  
ENSG00000167792  
ENSG00000110057  
ENSG00000110717  
ENSG00000110719  
ENSG00000162337  
ENSG00000069482  
ENSG00000110090  
ENSG00000132740  
ENSG00000162341  
ENSG00000110092  
ENSG00000186895  
ENSG00000168040  
ENSG00000162105  
ENSG00000172893  
ENSG00000137497  
ENSG00000184154  
ENSG00000110195  
ENSG00000165458  
ENSG00000165462  
ENSG00000162129  
ENSG00000187726  
ENSG00000175567  
ENSG00000175564  
ENSG00000168014  
ENSG00000175538  
ENSG00000149257  
ENSG00000149260  
ENSG00000137474  
ENSG00000159063  
ENSG00000137513  
ENSG00000149256  
ENSG00000171204  
ENSG00000171202  
ENSG00000073921  
ENSG00000074266

ENSG00000149196  
ENSG00000174804  
ENSG00000109861  
ENSG00000077498  
ENSG00000134640  
ENSG00000042429  
ENSG00000020922  
ENSG00000166037  
ENSG00000087053  
ENSG00000184384  
ENSG00000137672  
ENSG00000137693  
ENSG00000137674  
ENSG00000196611  
ENSG00000149968  
ENSG00000137745  
ENSG00000187240  
ENSG000000204403  
ENSG00000075239  
ENSG00000149311  
ENSG00000110723  
ENSG00000137710  
ENSG00000137713  
ENSG00000086848  
ENSG00000109846  
ENSG00000150768  
ENSG00000204370  
ENSG00000150787  
ENSG00000170209  
ENSG00000109906  
ENSG00000110243  
ENSG00000110245  
ENSG00000118137  
ENSG00000110274  
ENSG00000137731  
ENSG00000110324  
ENSG00000177098  
ENSG00000149575  
ENSG00000198851  
ENSG00000167286  
ENSG00000160654  
ENSG00000118058  
ENSG000000095139  
ENSG00000137700  
ENSG00000160695  
ENSG00000256269  
ENSG00000172269  
ENSG00000110395  
ENSG00000235718  
ENSG00000235718  
ENSG00000110400  
ENSG00000109927  
ENSG00000109929  
ENSG00000166250  
ENSG00000166257  
ENSG00000110013  
ENSG00000154134  
ENSG00000165478  
ENSG00000134910  
ENSG00000198331  
ENSG00000110060  
ENSG00000064309  
ENSG00000111074  
ENSG00000150455  
ENSG00000110063  
ENSG00000149571  
ENSG00000151702  
ENSG00000151704  
ENSG00000120457  
ENSG00000149418  
  
ENSG00000183715  
ENSG00000166086  
ENSG00000151498  
ENSG00000060237  
ENSG00000151062  
ENSG00000151067  
ENSG00000118971  
ENSG00000118972  
ENSG00000139180  
ENSG00000111262  
ENSG00000130037  
ENSG00000110799  
ENSG00000067182  
ENSG00000111319  
ENSG00000139193  
ENSG00000139190  
ENSG00000111642  
ENSG00000010610  
ENSG00000111664  
ENSG00000111669  
ENSG00000111676  
ENSG00000111678  
ENSG00000126749  
ENSG00000182326  
ENSG00000159403  
ENSG00000139197  
ENSG00000184344  
ENSG00000089818  
ENSG00000111732  
ENSG00000197614  
ENSG00000111752  
ENSG00000175899  
ENSG00000172243  
ENSG00000173391  
ENSG00000139083  
ENSG00000070018  
ENSG00000111276  
ENSG000000273079  
ENSG00000070019  
ENSG00000111339  
ENSG00000111341  
ENSG00000139053  
ENSG00000151490  
ENSG00000151491  
ENSG00000139151  
ENSG00000172572  
ENSG00000111700

ENSG00000134538  
ENSG00000121350  
ENSG00000111713  
ENSG00000111716  
ENSG00000069431  
ENSG00000134532  
ENSG00000133703  
ENSG00000123095  
ENSG00000123104  
ENSG00000087494  
ENSG0000013573  
ENSG00000139132  
ENSG00000087470  
ENSG00000139131  
ENSG00000057294  
ENSG00000139133  
ENSG00000139116  
ENSG00000188906  
ENSG0000018236  
ENSG00000139174  
ENSG00000198001  
ENSG00000177119  
ENSG0000011424  
ENSG00000139219  
ENSG00000152556  
ENSG00000174233  
ENSG00000139537  
ENSG00000169884  
ENSG00000125084  
ENSG00000167548  
ENSG00000139549  
ENSG00000167552  
ENSG00000135406  
ENSG00000167580  
ENSG00000161798  
ENSG00000167588  
ENSG00000178449  
ENSG00000066084  
ENSG00000110911  
ENSG00000196876  
ENSG00000139567  
ENSG00000135503  
ENSG00000170442  
ENSG00000205426  
ENSG00000170523  
ENSG00000135443  
ENSG00000170454  
ENSG00000185479  
ENSG00000170465  
ENSG00000205420  
ENSG00000186081  
ENSG00000139648  
ENSG00000170484  
ENSG00000172867  
ENSG00000167768  
ENSG00000186442  
ENSG00000170477  
ENSG00000170421  
ENSG00000111057  
ENSG00000094914  
ENSG00000170374  
ENSG00000135409  
ENSG00000123364  
ENSG00000135486  
ENSG00000135424  
ENSG00000135437  
ENSG00000123342  
ENSG00000139531  
ENSG00000197728  
ENSG00000065361  
ENSG00000139540  
ENSG00000170581  
ENSG00000135517  
ENSG00000166863  
ENSG00000123384  
ENSG00000185482  
ENSG00000166986  
ENSG00000155980  
ENSG00000135454  
ENSG00000135446  
ENSG00000111012  
ENSG00000123297  
ENSG00000177990  
ENSG00000118600  
ENSG00000196935  
ENSG00000183735  
ENSG00000135677  
ENSG00000174108  
ENSG00000174099  
ENSG00000090376  
ENSG00000155974  
ENSG00000111537  
ENSG00000111581  
ENSG00000135679  
ENSG00000090382  
ENSG00000139287  
ENSG00000179941  
ENSG00000165899  
ENSG00000139304  
ENSG00000111046  
ENSG00000180318  
ENSG00000198707  
ENSG00000139324  
ENSG00000049130  
ENSG00000139318  
ENSG00000139323  
ENSG00000139330  
ENSG0000011465  
ENSG00000169372  
ENSG00000173588  
ENSG00000184752  
ENSG00000084110  
ENSG00000075415  
ENSG00000179520  
ENSG0000012504  
ENSG00000196091  
ENSG00000139351  
ENSG00000111670

ENSG0000017427  
ENSG00000171759  
ENSG00000139352  
ENSG00000136051  
ENSG0000013503  
ENSG0000008405  
ENSG00000136003  
ENSG00000076248  
ENSG00000151148  
ENSG00000139428  
ENSG00000110921  
ENSG00000111399  
ENSG00000174437  
ENSG00000204852  
ENSG00000111245  
ENSG00000111252  
ENSG00000204842  
ENSG00000111275  
ENSG00000179295  
ENSG00000089127  
ENSG00000089225  
ENSG00000135111  
ENSG00000123066  
ENSG00000152137  
ENSG0000012966  
ENSG00000111775  
ENSG0000012971  
ENSG00000135100

ENSG00000158104  
ENSG00000110987  
ENSG00000184047  
ENSG00000139719  
ENSG00000130921  
ENSG00000111361  
ENSG00000168778  
ENSG00000185744  
ENSG00000073060  
ENSG00000177192  
ENSG00000187848  
ENSG00000177084  
ENSG00000176915  
ENSG00000121743  
ENSG00000165474  
ENSG00000121742  
ENSG00000102678  
ENSG00000102683  
ENSG00000151835  
ENSG00000027001  
ENSG00000151849  
ENSG00000132932  
ENSG00000127870  
ENSG00000122026  
ENSG00000186184  
ENSG00000139515  
ENSG00000122025  
ENSG00000132963  
ENSG00000132965  
ENSG00000187676  
ENSG00000139618  
ENSG00000133116  
ENSG00000133104  
ENSG00000133111  
ENSG00000120693  
ENSG00000120699  
ENSG00000150893  
ENSG00000133103  
ENSG00000150907  
ENSG00000102743  
ENSG00000120659  
ENSG00000102468  
ENSG00000136143  
ENSG00000136159  
ENSG00000136156  
ENSG00000139687  
ENSG00000139679  
ENSG00000136147  
ENSG00000136144  
ENSG00000136104  
ENSG00000123191  
ENSG00000253710

ENSG00000139734

ENSG00000136111  
ENSG00000102805  
ENSG00000136160  
ENSG00000136158  
ENSG00000178235  
ENSG00000184564  
ENSG00000215417  
ENSG00000183098  
ENSG00000088451  
ENSG00000102580  
ENSG00000043355  
ENSG00000175198  
ENSG00000102452  
ENSG00000102466  
ENSG00000134899  
ENSG00000125255  
ENSG00000174405  
ENSG00000185950  
ENSG00000187498  
ENSG00000134871  
ENSG00000134905  
ENSG00000153487  
ENSG00000057593  
ENSG00000126218  
ENSG00000126231  
ENSG00000185974  
ENSG00000198824  
ENSG00000198805  
ENSG00000142774  
ENSG00000092200  
ENSG00000100888  
ENSG00000165821

ENSG00000155465

ENSG00000157227  
ENSG00000092067  
ENSG00000100836  
ENSG00000197616  
ENSG00000092054  
ENSG00000129535  
ENSG00000092330  
ENSG00000092295  
ENSG00000176165  
ENSG00000184304  
ENSG00000100473  
ENSG00000100478  
ENSG00000151413  
ENSG00000165410  
ENSG00000100902  
ENSG00000100906  
ENSG00000136352  
ENSG00000198807  
ENSG00000100934  
ENSG00000213741  
ENSG00000168282  
ENSG00000165506  
ENSG00000100485  
ENSG00000087299  
ENSG00000198513  
ENSG00000100503  
ENSG00000100504  
ENSG00000168229  
ENSG00000125384  
ENSG00000100523  
ENSG00000125378  
ENSG00000131979  
ENSG00000070269  
ENSG00000165588  
ENSG00000100578  
ENSG00000165617  
ENSG00000184302  
ENSG00000126778  
ENSG00000126814  
ENSG00000027075  
ENSG00000054654  
ENSG00000100714  
ENSG00000070182  
ENSG00000125952  
ENSG00000171723  
ENSG00000072042  
ENSG00000139988  
ENSG00000072121  
ENSG00000072110  
ENSG00000198732  
ENSG00000080815  
ENSG00000119661  
ENSG00000119723  
ENSG00000119711  
ENSG00000119614  
ENSG00000119688  
ENSG00000119655  
ENSG00000165898  
ENSG00000119681  
ENSG00000119718  
ENSG00000119684  
ENSG00000119638  
ENSG00000119686  
ENSG00000119685  
ENSG00000119699  
ENSG00000119650  
ENSG00000119715  
ENSG00000009830  
ENSG00000151445  
ENSG00000100596  
ENSG00000165409  
ENSG00000054983  
ENSG00000042317  
ENSG00000100722  
ENSG00000165533  
ENSG00000042088  
ENSG00000198668  
ENSG00000119714  
ENSG00000015133  
ENSG00000140092  
ENSG00000100815  
ENSG00000066427  
ENSG00000140090  
ENSG00000170099  
ENSG00000197249  
ENSG00000196136  
ENSG00000133937  
ENSG00000100697  
ENSG00000182512  
ENSG00000100749  
ENSG00000127152  
ENSG00000066629  
ENSG00000100811  
ENSG00000197102  
ENSG00000196663  
ENSG00000131323  
ENSG00000166126  
ENSG00000256053  
ENSG00000126215  
ENSG00000203485  
ENSG00000185100  
ENSG00000142208  
ENSG00000179627  
ENSG00000185024

ENSG00000170113  
ENSG00000179455  
ENSG00000254585  
ENSG00000182636  
ENSG00000128739  
ENSG00000114062  
ENSG00000166206  
ENSG00000104044  
ENSG00000128731  
ENSG00000185115  
ENSG00000198690  
ENSG00000134160

ENSG00000140199  
ENSG00000182117  
ENSG00000159251  
ENSG00000186073  
ENSG00000134138  
ENSG00000166068  
ENSG00000128829  
ENSG00000156970  
ENSG00000128928  
  
ENSG00000137812  
ENSG00000051180  
ENSG00000128917  
ENSG00000137806  
ENSG00000137802  
ENSG00000092529  
ENSG00000140326  
ENSG00000128881  
ENSG00000159459  
ENSG00000166947  
ENSG00000104055  
ENSG00000137822  
ENSG00000242866  
ENSG00000104133  
  
ENSG00000140279  
ENSG00000140274  
ENSG00000171766  
ENSG00000104164  
ENSG00000188467  
ENSG00000074803  
ENSG00000166147  
ENSG00000103995  
ENSG00000140287  
ENSG00000092439  
ENSG00000081014  
ENSG00000137869  
ENSG00000186417  
ENSG00000104093  
ENSG00000069966  
ENSG00000197535  
ENSG00000166415  
ENSG00000069974  
ENSG00000256061  
ENSG00000140262  
ENSG00000166035  
ENSG00000137845  
ENSG00000157483  
ENSG00000129003  
ENSG00000140416  
ENSG00000074410  
ENSG00000103657  
ENSG00000166794  
ENSG00000103671  
ENSG00000090487  
ENSG00000103707  
ENSG00000234438  
ENSG00000138615  
ENSG00000074621  
ENSG00000169032  
ENSG00000137834  
ENSG00000166949  
ENSG00000103591  
ENSG00000128973  
ENSG00000278570  
ENSG00000213614  
ENSG00000140463  
ENSG00000138622  
ENSG00000129038  
ENSG00000140464  
ENSG00000137868  
ENSG00000140459  
ENSG00000138623  
ENSG00000179151  
ENSG00000178802  
ENSG00000169375  
ENSG00000140374  
ENSG00000140368  
ENSG00000136425  
ENSG00000169684  
ENSG00000080644  
ENSG00000207695  
ENSG00000103876  
ENSG00000172379  
ENSG00000182774  
ENSG00000103723  
ENSG00000103942  
ENSG00000177082  
ENSG00000273540  
ENSG00000157766  
ENSG00000140522  
ENSG00000140525  
ENSG00000140521  
ENSG00000166813  
ENSG00000166819  
ENSG00000188095  
ENSG00000182054  
ENSG00000197299  
ENSG00000184056  
ENSG00000173575  
ENSG00000185551  
ENSG00000140443  
ENSG00000068305  
ENSG00000140470  
ENSG00000154227  
ENSG00000140471  
ENSG00000184254  
ENSG00000131873  
ENSG00000103148  
ENSG00000188536  
ENSG00000206172  
ENSG00000103126  
ENSG00000103266  
ENSG00000162094  
ENSG00000260807  
ENSG00000162009  
ENSG00000196557  
ENSG00000090581

ENSG00000103249  
ENSG00000100726  
ENSG00000187535  
ENSG00000099769  
ENSG00000127554  
ENSG00000065057  
ENSG00000103197  
ENSG00000008710  
ENSG00000167972  
ENSG00000162065  
ENSG00000131652  
ENSG00000103313  
ENSG00000188827  
ENSG00000123918  
ENSG00000005339  
ENSG00000126603  
ENSG00000127930  
ENSG00000140623  
ENSG00000067836  
ENSG00000033011  
ENSG00000183044  
ENSG00000140650  
ENSG00000183454  
ENSG00000123853  
ENSG00000179583  
ENSG00000189067  
ENSG00000175595  
ENSG00000140694  
ENSG00000072864  
ENSG00000133392  
ENSG00000091262  
ENSG00000103489  
ENSG00000170540  
ENSG00000167186  
ENSG00000169344  
ENSG00000103316  
ENSG00000155719  
ENSG00000140740  
ENSG00000166828  
ENSG00000168447  
ENSG00000168434  
ENSG00000103356  
ENSG00000083093  
ENSG00000077238  
ENSG00000103522  
ENSG00000047578  
ENSG00000188603  
ENSG00000178952  
ENSG00000196296  
ENSG00000177455  
ENSG00000123658  
ENSG00000079616  
ENSG00000167371  
ENSG00000149925  
ENSG00000149922  
ENSG00000102879  
ENSG00000080603  
ENSG00000156873  
ENSG00000099377  
ENSG00000099365  
ENSG00000167397  
ENSG00000103507  
ENSG00000099280  
ENSG00000169896  
ENSG00000140691  
ENSG00000140675  
ENSG00000069329  
ENSG00000091651  
ENSG00000166123  
ENSG00000102893  
ENSG00000121270  
ENSG00000102935  
ENSG00000167207  
ENSG00000083799  
ENSG00000103449  
ENSG00000103494  
ENSG00000140718  
ENSG00000176842  
ENSG00000087245  
ENSG00000103546  
ENSG00000198848  
ENSG00000087258  
ENSG00000125124  
ENSG00000102900  
ENSG00000070915  
ENSG00000087237  
ENSG00000159579  
ENSG00000102931  
ENSG00000088682  
ENSG00000205336  
ENSG00000140854  
ENSG00000070729  
ENSG00000103005  
ENSG00000166546  
ENSG00000166548  
ENSG00000102878  
ENSG00000140939  
ENSG00000176387  
ENSG00000159723  
ENSG00000102974  
ENSG00000102977  
ENSG00000213398  
ENSG00000132600  
ENSG00000062038  
ENSG00000039068  
ENSG00000272617  
ENSG00000181019  
ENSG00000090861  
ENSG00000103051  
ENSG00000103043  
ENSG00000157423  
ENSG00000198650  
ENSG00000102967  
ENSG00000257017  
ENSG00000140836  
ENSG00000103089  
ENSG00000183196  
ENSG00000205084



ENSG00000065427  
ENSG00000140873  
ENSG00000186153  
ENSG00000178573  
ENSG00000140905  
ENSG00000135697  
ENSG00000261609  
ENSG00000197943  
ENSG00000103150  
ENSG00000166558  
ENSG00000154099  
ENSG00000140968  
ENSG00000102241  
ENSG00000176692  
ENSG00000103264  
ENSG00000154118  
ENSG00000174990  
ENSG00000225614  
ENSG00000051523  
ENSG00000167508  
ENSG00000103335  
ENSG00000167513  
ENSG00000198931  
ENSG00000141012  
ENSG00000176715  
ENSG00000129910  
ENSG00000167522  
ENSG00000197912  
ENSG00000131165  
ENSG00000187741  
ENSG00000258839  
ENSG00000258947  
ENSG00000141013  
ENSG00000141252  
ENSG00000205899  
ENSG00000132376  
ENSG00000174231  
ENSG00000167716  
ENSG00000167711  
ENSG00000132386  
ENSG00000108963  
ENSG00000007168  
ENSG00000108381  
ENSG00000167723  
ENSG00000197417  
ENSG00000040531  
ENSG00000141497  
ENSG00000108556  
ENSG00000185245  
ENSG00000108518  
ENSG00000108515  
ENSG00000129250  
ENSG00000132517  
ENSG00000091592  
ENSG00000129221  
ENSG00000091622  
ENSG00000198920  
ENSG00000141485  
ENSG00000072778  
ENSG00000170175  
ENSG00000129255  
ENSG00000141510  
ENSG00000141499  
ENSG00000132518  
ENSG00000179477  
ENSG00000179148  
ENSG00000179111  
ENSG00000200463  
ENSG00000178971  
ENSG00000161970  
ENSG00000141506  
ENSG00000133020  
ENSG00000125414  
ENSG00000109063  
ENSG00000133028  
ENSG00000006744  
ENSG00000006695  
ENSG00000109099  
ENSG00000011295  
ENSG00000108474  
ENSG00000240505  
ENSG00000154803  
ENSG00000108557  
ENSG00000171953  
ENSG00000091536  
ENSG00000108641  
ENSG00000072210  
ENSG00000108599  
ENSG00000260458  
ENSG000000276085  
ENSG00000007171  
ENSG00000244045  
ENSG00000076351  
ENSG00000109101  
ENSG00000109103  
ENSG00000160602  
ENSG00000132591  
ENSG00000108255  
ENSG00000108576  
ENSG00000181481  
ENSG00000196712  
ENSG00000006042  
ENSG00000108691  
ENSG00000172156  
ENSG00000185379  
ENSG00000141161  
ENSG00000236320  
ENSG00000108733  
ENSG00000271503  
ENSG00000273611  
ENSG00000277161  
ENSG00000275410  
ENSG00000273999  
ENSG00000173991  
ENSG00000161395  
ENSG00000141736  
ENSG00000126351  
ENSG00000094804

ENSG00000131747  
ENSG00000073584  
ENSG00000204897  
ENSG00000186395  
ENSG00000187242  
ENSG00000171401  
ENSG00000171403  
ENSG00000186847  
ENSG00000186832  
ENSG00000128422  
ENSG00000173801  
ENSG00000141756  
ENSG00000161594  
ENSG00000204815  
ENSG00000161610  
ENSG00000173757  
ENSG00000168610  
ENSG00000177469  
ENSG00000108784  
ENSG00000068120  
ENSG00000131470  
ENSG00000131462  
ENSG00000108797  
ENSG00000126562  
ENSG00000131482  
ENSG00000131469  
ENSG0000012048  
ENSG00000005102  
ENSG00000167941  
ENSG00000161653  
ENSG00000141349  
ENSG00000004939  
ENSG000000030582  
ENSG00000005961  
ENSG00000108883  
ENSG00000167131  
ENSG00000131095  
ENSG00000225190  
ENSG00000186868  
ENSG00000120071  
ENSG00000108379  
ENSG00000108433  
ENSG00000198336  
ENSG00000259207  
ENSG00000073861  
ENSG00000108439

ENSG00000167085  
ENSG00000108813  
ENSG00000064195  
ENSG00000005884  
ENSG00000108823  
ENSG00000108821  
ENSG0000015532  
ENSG0000006283  
ENSG00000239672  
ENSG00000183691  
ENSG00000153933  
ENSG00000121053  
ENSG00000111143  
ENSG00000005381  
ENSG00000108375  
ENSG00000108384  
ENSG00000108395  
ENSG00000141378  
ENSG00000167434  
ENSG00000170836  
ENSG00000121075  
ENSG00000136492  
ENSG00000159640  
ENSG00000136463  
ENSG00000266173  
ENSG00000108604  
ENSG00000259384  
ENSG0000007312  
ENSG00000007314  
ENSG00000256525  
ENSG00000108370  
ENSG00000168646  
ENSG00000154229  
ENSG00000197170  
ENSG00000108946  
ENSG00000108950  
ENSG00000123700  
ENSG00000125398  
ENSG00000166685  
ENSG00000171595  
ENSG00000109062  
ENSG00000182040  
ENSG00000125454  
ENSG00000182173  
ENSG00000132470  
ENSG00000108479  
ENSG00000092929  
ENSG00000161533  
ENSG00000129667  
ENSG00000214140  
ENSG00000181038  
ENSG00000184640  
ENSG00000141524  
ENSG00000167895  
ENSG00000171302  
ENSG00000173894  
ENSG00000141519  
ENSG00000171298  
ENSG00000141543  
ENSG00000141527  
ENSG00000181523  
ENSG00000173821  
ENSG00000184009  
ENSG00000186765  
ENSG00000185527  
ENSG00000215644  
ENSG00000185624  
ENSG00000141522  
ENSG00000183010  
ENSG00000169696  
ENSG00000169738

ENSG00000141551  
ENSG00000141556  
ENSG00000141579  
ENSG00000101596  
ENSG00000101577  
ENSG00000177426  
ENSG00000101680  
ENSG00000178127  
ENSG00000154856  
ENSG00000154864  
ENSG00000141404  
ENSG00000141385  
ENSG00000185231  
ENSG00000101752  
ENSG00000141448  
ENSG00000101773  
ENSG00000141458  
ENSG00000053747  
ENSG00000141384  
ENSG00000134504  
ENSG00000134762  
ENSG00000134755  
ENSG00000134760  
ENSG00000175065  
ENSG00000046604  
ENSG00000118271  
ENSG00000101695  
ENSG00000141431  
ENSG00000134769  
ENSG00000166974  
ENSG00000134759  
ENSG00000075643  
ENSG00000152217  
ENSG00000141469  
ENSG00000152223  
ENSG00000152234  
ENSG00000167210  
ENSG00000134049  
ENSG00000101665  
ENSG00000141627  
ENSG00000167306  
ENSG00000172361  
ENSG00000141646  
ENSG00000187323  
ENSG00000196628  
ENSG00000066926  
ENSG00000081923  
ENSG00000049759  
ENSG00000172175  
ENSG00000134438  
ENSG00000074695  
ENSG00000183287  
ENSG00000166603  
ENSG00000197563  
ENSG00000141655  
ENSG00000171791  
ENSG00000119537  
ENSG00000166396  
ENSG00000166401  
ENSG00000176225  
ENSG00000166347  
ENSG00000179981  
ENSG00000060069  
ENSG00000141759  
ENSG00000172270  
ENSG00000197561  
ENSG00000197766  
ENSG00000116014  
ENSG00000046487  
ENSG00000167468  
ENSG00000118046  
ENSG00000115286  
ENSG00000130005  
ENSG00000115266  
ENSG00000115255  
ENSG00000071564  
ENSG00000213638  
ENSG00000065000  
ENSG00000104899  
ENSG00000176619  
ENSG00000104953  
ENSG00000088256  
ENSG00000179855  
ENSG00000006638  
ENSG00000186111  
ENSG00000173976  
ENSG00000167654  
ENSG00000167658  
ENSG00000126934  
ENSG00000127666  
ENSG00000196365  
ENSG00000156413  
ENSG00000171124  
ENSG00000174886  
ENSG00000125656  
ENSG00000104833  
ENSG00000125730  
ENSG00000171105  
ENSG00000104880  
ENSG00000090674  
ENSG00000032444  
ENSG00000229833  
ENSG00000076944  
ENSG00000104918  
ENSG00000090659  
ENSG00000167775  
ENSG00000233927  
ENSG00000167772  
ENSG00000142303  
ENSG00000130816  
ENSG00000267534  
ENSG00000090339  
ENSG00000105371  
ENSG00000105397  
ENSG00000079805  
ENSG00000127616  
ENSG00000130164  
ENSG00000197256

ENSG00000130158  
ENSG00000187266  
ENSG00000198003  
ENSG00000130175  
ENSG00000102575  
ENSG00000104774  
ENSG00000104889  
ENSG00000105610  
ENSG00000105607  
ENSG00000179218  
ENSG00000008441  
ENSG00000160877  
ENSG00000141837  
ENSG00000132024  
ENSG00000072062  
ENSG000000099797  
ENSG00000127507  
ENSG00000105141  
ENSG00000074181  
ENSG00000171954  
ENSG00000269058  
ENSG00000160111  
ENSG00000099331  
ENSG00000130299  
ENSG00000248099  
ENSG00000105639  
ENSG00000105641  
ENSG00000006996  
ENSG00000105647  
ENSG00000006016  
ENSG00000105662  
ENSG00000105664  
ENSG00000223802  
ENSG00000223802  
ENSG00000064490  
ENSG00000186010  
ENSG00000131943  
ENSG00000186376  
ENSG00000214488  
ENSG00000245848  
ENSG00000124299  
ENSG00000124302  
ENSG00000105220  
ENSG00000105711  
ENSG00000153902  
ENSG00000105697  
ENSG00000105695  
ENSG00000126267  
ENSG00000272333  
ENSG00000205155  
ENSG00000161270  
ENSG0000011600  
ENSG00000205138  
ENSG00000181392  
ENSG00000105270  
ENSG00000075702  
ENSG00000105738  
ENSG00000167642  
ENSG00000196218  
ENSG00000130402  
ENSG00000104835  
ENSG00000197110  
ENSG00000090924  
ENSG00000090932  
ENSG00000105204  
ENSG00000105221  
ENSG00000105227  
ENSG00000160460  
ENSG00000090006  
ENSG00000123815  
ENSG00000086544  
ENSG00000255974  
ENSG00000197408  
ENSG00000105329  
ENSG00000123810  
ENSG00000248098  
ENSG00000105372  
ENSG00000105369  
ENSG00000105409  
ENSG00000105722  
ENSG00000105429  
ENSG00000079435  
ENSG00000105755  
ENSG00000105771  
ENSG00000104783  
ENSG00000213892  
ENSG00000187244  
ENSG00000130203  
ENSG00000234906  
ENSG00000189114  
ENSG00000104884  
ENSG0000012061  
ENSG00000125744  
ENSG00000125741  
ENSG00000177045  
ENSG00000104936  
ENSG00000169515  
ENSG00000181027  
ENSG00000042753  
ENSG00000118162  
ENSG00000105392  
ENSG00000105486  
ENSG00000105479  
ENSG00000105464  
ENSG00000176920  
ENSG00000174951  
ENSG00000087088  
ENSG00000087086  
ENSG00000104812  
ENSG00000104826  
ENSG00000225950  
ENSG00000130529  
ENSG00000126456  
ENSG00000169169  
ENSG0000010361  
ENSG00000104973  
ENSG00000039650  
ENSG00000213024

ENSG00000105357  
ENSG00000131398  
ENSG00000062822  
ENSG00000142513  
ENSG00000167748  
ENSG00000167749  
ENSG00000105379  
ENSG00000105370  
ENSG00000105568  
ENSG00000142405  
ENSG00000126583  
ENSG00000105618  
ENSG00000125505  
ENSG00000170892  
ENSG00000167633  
ENSG00000167634  
ENSG00000088053  
ENSG00000105048  
ENSG00000129991  
ENSG00000167646  
ENSG00000105146  
ENSG00000125826  
ENSG00000125875  
ENSG00000101266  
ENSG00000101276  
ENSG00000101282  
ENSG00000101327  
ENSG00000125780  
ENSG00000166948  
ENSG00000125835  
ENSG00000101361  
ENSG00000101365  
ENSG00000101200  
ENSG00000125877  
ENSG00000088836  
ENSG00000125779  
ENSG00000171867  
ENSG00000132646  
ENSG00000101292  
ENSG00000125885  
ENSG00000101311  
ENSG00000125845  
ENSG00000182621  
ENSG00000101333  
ENSG00000132639  
ENSG00000125863  
ENSG00000101384  
ENSG00000101247  
ENSG00000125848  
ENSG00000125864  
ENSG00000125871  
ENSG00000125850  
ENSG00000101310  
ENSG00000132669  
ENSG00000088970  
ENSG00000125813  
ENSG00000178726  
ENSG00000101439  
ENSG00000100987  
ENSG00000100997  
  
ENSG00000131055  
ENSG00000101306  
ENSG00000101346  
ENSG00000171456  
ENSG00000088305  
ENSG00000167098  
ENSG00000101400  
ENSG00000101421  
ENSG00000101440  
ENSG00000101444  
ENSG00000078747  
ENSG00000100983  
ENSG00000125965  
ENSG00000088367  
ENSG00000101347  
ENSG00000197122  
ENSG00000204103  
ENSG00000198900  
ENSG00000101052  
ENSG00000149596  
ENSG00000101076  
ENSG00000196839  
ENSG00000101109  
ENSG00000124155  
ENSG00000064601  
ENSG00000100979  
ENSG00000198026  
ENSG00000100985  
ENSG00000124140  
ENSG00000101017  
ENSG00000062598  
ENSG00000197496  
ENSG00000124198  
ENSG00000158445  
ENSG00000124212  
ENSG00000196396  
ENSG00000101126  
ENSG00000000419  
ENSG00000101115  
ENSG00000019186  
ENSG00000124089  
ENSG00000087586  
ENSG00000124164  
ENSG00000124222  
ENSG00000235590  
ENSG00000087460  
ENSG00000101162  
ENSG00000124172  
ENSG00000124205  
ENSG00000130703  
ENSG00000092758  
ENSG00000101194  
ENSG00000101204  
ENSG00000075043  
ENSG00000101210  
ENSG00000258366  
ENSG00000101152

ENSG00000101161  
ENSG00000203883  
ENSG00000188992  
ENSG00000154646  
ENSG00000142192  
ENSG00000142168  
ENSG00000170262  
ENSG00000159079  
ENSG00000159082  
ENSG00000159110  
ENSG00000243646  
ENSG00000159128  
ENSG00000159140  
ENSG00000159197  
ENSG00000180509  
ENSG00000159216  
ENSG00000159261  
ENSG00000159267  
ENSG00000157540  
ENSG00000157542  
ENSG00000183421  
ENSG00000160183  
ENSG00000160188  
ENSG00000160200  
ENSG00000160202  
ENSG00000142178  
ENSG00000160213  
ENSG00000160224  
ENSG00000160226  
ENSG00000175894  
ENSG00000160255  
ENSG00000182871  
ENSG00000142156  
ENSG00000142173  
ENSG00000160282  
ENSG00000160285  
ENSG00000160299  
ENSG00000177863  
ENSG00000093072  
ENSG00000131100  
ENSG00000215193  
ENSG00000183785  
ENSG00000184979  
ENSG00000100033  
ENSG00000100075  
ENSG00000093009  
ENSG00000203618  
ENSG00000184058  
ENSG00000093010  
ENSG00000183597  
ENSG00000040608  
ENSG00000244486  
ENSG00000241973  
ENSG00000099937  
ENSG00000099940  
ENSG00000099949  
ENSG00000186716  
ENSG00000128322  
ENSG00000250479  
ENSG00000099956  
ENSG00000240972  
ENSG00000100014  
ENSG00000100024  
ENSG00000100053  
ENSG00000244752  
ENSG00000133454  
ENSG00000100099  
ENSG00000100122  
ENSG00000196431  
ENSG00000225783  
ENSG00000169184  
ENSG00000183765  
ENSG00000100219  
ENSG00000183762  
ENSG00000182944  
ENSG00000100285  
ENSG00000186575  
ENSG00000185339  
ENSG00000133422  
ENSG00000100150  
ENSG00000100170  
ENSG00000100225  
ENSG00000100234  
ENSG00000133424  
ENSG00000100292  
ENSG00000100297  
ENSG00000100342  
ENSG00000100345  
ENSG00000100348  
ENSG00000166862  
ENSG00000100360  
ENSG00000100365  
ENSG00000100368  
ENSG00000100379  
ENSG00000187045  
ENSG00000128340  
ENSG00000100079  
ENSG00000100106  
ENSG00000100146  
ENSG00000184381  
ENSG00000100246  
ENSG00000100311  
ENSG00000239900  
ENSG00000196588  
ENSG00000196236  
ENSG00000100393  
ENSG00000100412  
ENSG00000159958  
ENSG00000198951  
ENSG00000100197  
ENSG00000100243  
ENSG00000128274  
ENSG00000130638  
ENSG00000186951  
ENSG00000100416  
ENSG00000182858  
ENSG00000100427  
ENSG00000128159

ENSG00000100241  
ENSG00000130489  
ENSG00000025708  
ENSG00000100288  
ENSG00000100299  
ENSG00000251322  
  
ENSG00000185960  
ENSG00000198223  
ENSG00000157399  
ENSG00000146938  
ENSG00000101846  
ENSG000000011201  
ENSG00000101850  
ENSG00000073464  
ENSG00000101871  
ENSG000000004961  
ENSG00000125363  
ENSG00000169933  
ENSG00000196459  
ENSG00000046651  
ENSG00000181544  
ENSG00000165195  
ENSG00000182287  
ENSG00000188158  
ENSG00000008086  
ENSG00000102104  
ENSG00000044446  
ENSG00000173698  
ENSG00000131828  
ENSG00000177189  
ENSG00000091482  
ENSG000000012174  
ENSG00000102172  
ENSG00000102174  
ENSG00000165186  
ENSG00000174010  
ENSG00000130741  
ENSG00000067992  
ENSG00000101868  
ENSG000000004848  
ENSG00000169306  
ENSG00000169297  
ENSG00000198814  
ENSG00000198947  
ENSG00000047597  
ENSG00000165168  
ENSG00000156313  
ENSG00000036473  
ENSG00000156298  
ENSG00000183337  
ENSG00000182220  
ENSG00000124486  
ENSG00000215301  
ENSG00000188937  
ENSG00000147044  
ENSG00000189221  
ENSG00000124479  
ENSG00000147050  
ENSG00000102218  
ENSG00000147123  
ENSG00000182872  
ENSG00000130985  
ENSG00000008056  
ENSG00000126759  
ENSG00000126752  
ENSG00000068438  
ENSG00000102312  
ENSG00000147155  
ENSG00000015285  
ENSG00000102145  
ENSG00000094631  
ENSG00000102103  
ENSG00000102100  
ENSG00000068323  
ENSG00000196998  
ENSG00000102003  
ENSG00000102001  
ENSG00000101997  
ENSG00000049768  
ENSG00000273820  
ENSG00000171365  
ENSG00000158352  
ENSG00000130385  
ENSG00000241476  
ENSG00000126012  
ENSG00000124313  
ENSG00000072501  
ENSG00000072506  
ENSG00000086758  
ENSG00000172943  
ENSG00000158526  
ENSG00000102302  
ENSG00000102316  
ENSG00000158578  
ENSG00000188021  
ENSG00000131089  
ENSG00000184675  
ENSG00000126970  
ENSG00000001497  
ENSG00000147065  
ENSG00000169083  
ENSG00000079482  
ENSG00000090776  
ENSG00000158813  
ENSG00000089289  
ENSG00000090889  
ENSG00000082458  
ENSG00000120498  
ENSG00000147168  
ENSG00000184634  
ENSG00000196338  
ENSG00000169562  
ENSG00000147140  
ENSG00000147133  
ENSG00000147162  
ENSG00000147099  
ENSG00000067177

ENSG00000229807  
ENSG00000147100  
ENSG00000131263  
ENSG00000050030  
ENSG00000131269  
ENSG00000102383  
ENSG00000196468  
ENSG00000008524  
ENSG00000102158  
ENSG00000131174  
ENSG00000165240  
ENSG00000102144  
ENSG00000122145  
ENSG00000165288  
ENSG00000196767  
ENSG00000147180  
ENSG00000124429  
ENSG00000188419  
ENSG00000147202  
ENSG00000165194  
ENSG00000102359  
ENSG00000126953  
ENSG0000010671  
ENSG00000102393  
ENSG00000126945  
ENSG00000123560  
ENSG00000123561  
ENSG00000080572  
ENSG00000147224  
ENSG00000080561  
ENSG00000197565  
ENSG00000188153  
ENSG00000068366  
ENSG00000101935  
ENSG00000101938  
ENSG00000077264  
ENSG00000077279  
ENSG00000101901  
ENSG00000102024  
ENSG000000268104  
ENSG00000077721  
ENSG00000125351  
ENSG00000125352  
ENSG00000125356  
ENSG00000005893  
ENSG00000158290  
ENSG00000171155  
ENSG00000182890  
ENSG00000125675  
ENSG00000125676  
ENSG00000101966  
ENSG00000183918  
ENSG00000122126  
ENSG00000122121  
ENSG00000188706  
ENSG00000156709  
ENSG00000147255  
ENSG00000165694  
ENSG00000147257  
ENSG00000156531  
ENSG00000165704  
ENSG00000198689  
ENSG00000022267  
ENSG00000102245  
ENSG00000129675  
ENSG00000147274  
ENSG00000165370  
ENSG00000156925  
ENSG00000101981  
ENSG00000134595  
ENSG00000102081  
ENSG00000155966  
ENSG0000010404  
ENSG0000013619  
ENSG00000171100  
ENSG00000029993  
ENSG00000160131  
ENSG00000147383  
ENSG00000182492  
ENSG00000067842  
ENSG00000262919  
ENSG00000130821  
ENSG00000185825  
ENSG00000101986  
ENSG00000180879  
ENSG00000198910  
ENSG00000126895  
ENSG00000102030  
ENSG00000172534  
ENSG00000169057  
ENSG00000102076  
ENSG00000268221  
ENSG00000196924  
ENSG00000102119  
ENSG00000147403  
ENSG00000102125  
ENSG00000071553  
ENSG00000203879  
ENSG00000160211  
ENSG00000269335  
ENSG00000130826  
ENSG00000185010  
ENSG00000155961  
ENSG00000155962  
ENSG00000185973  
ENSG00000185960  
ENSG00000184895  
ENSG00000114374
